# Supplementary material for: Genome-Wide Linkage-Disequilibrium Mapping to the Candidate Gene Level in Melon (Cucumis melo)
Source: PubMed Central journal article supplement (PMC5575340; doi:10.1038/s41598-017-09987-4), 2017-08-29
Supplement: 41598_2017_9987_MOESM1_ESM.pdf [file 41598_2017_9987_MOESM1_ESM.pdf]

## Supplementary information

### **Genome-Wide Linkage-Disequilibrium Mapping to the Candidate Gene Level in Melon (*Cucumis melo*)**

Amit Gur<sup>1\*</sup>, Galil Tzuri<sup>1</sup>, Ayala Meir<sup>1</sup>, Uzi Sa'ar<sup>1</sup>, Vitaly Portnoy<sup>1</sup>, Nurit Katzir<sup>1</sup>, Arthur A. Schaffer<sup>2</sup>, Li Li<sup>3</sup>, Joseph Burger<sup>1</sup> and Yaakov Tadmor<sup>1</sup>

<sup>1</sup>Plant Science Institute, Agricultural Research Organization, Newe Ya'ar Research Center, P.O. Box 1021, Ramat Yishay 3009500, Israel. <sup>2</sup>Plant Science Institute, Agricultural Research Organization, The Volcani Center, P.O. Box 15159, Rishon LeZiyyon 7507101, Israel. <sup>3</sup>Robert W Holley Center for Agriculture and Health, USDA-ARS, Plant Breeding and Genetics Section, School of Integrative Plant Science, Cornell University, Ithaca, New York 14853, USA.

\*Correspondence should be addressed to A.G. (e-mail: [amitgur@volcani.agri.gov.il](mailto:amitgur@volcani.agri.gov.il))

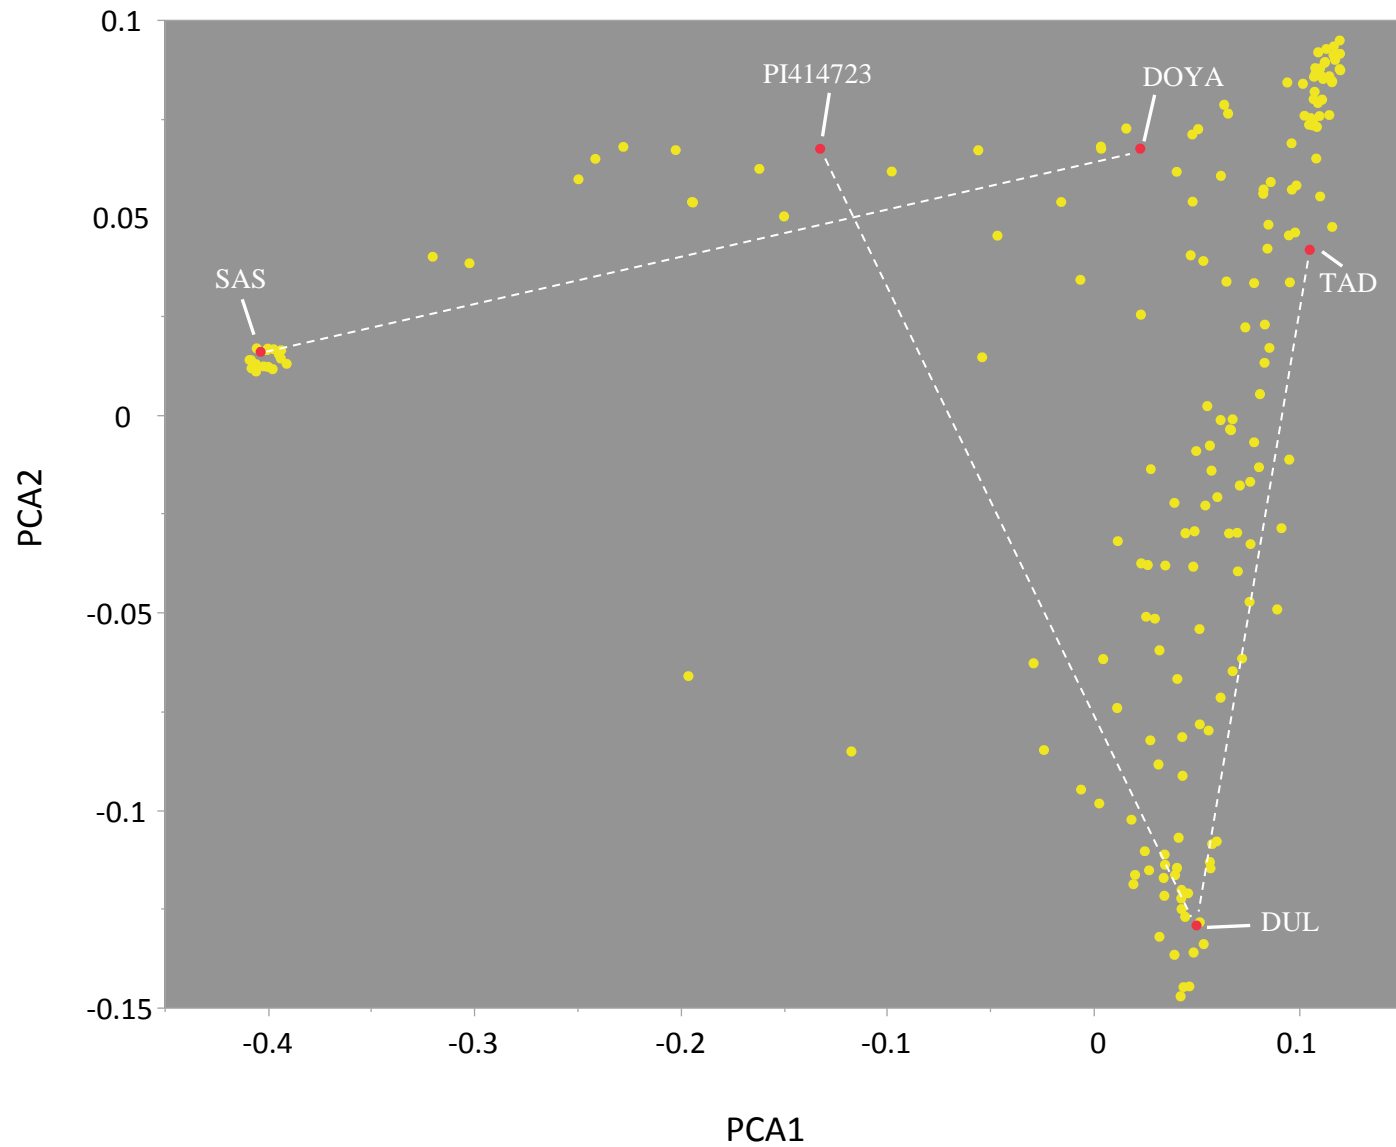

**Supplementary Figure S1: Parental lines of the 3 bi-parental populations highlighted on the genetic PCA analysis.** Crosses are shown in dashed white lines. SAS: *C. melo* ssp. *agrestis*, var *makuwa* . PI414723: *C. melo* ssp. *agrestis*, var *momordica*. DOYA: *C. melo* ssp. *melo*, var *flexuosus*. TADA: *C. melo* ssp. *melo*, var *inodorus*. DUL: *C. melo* ssp. *melo*, var *reticulatus*

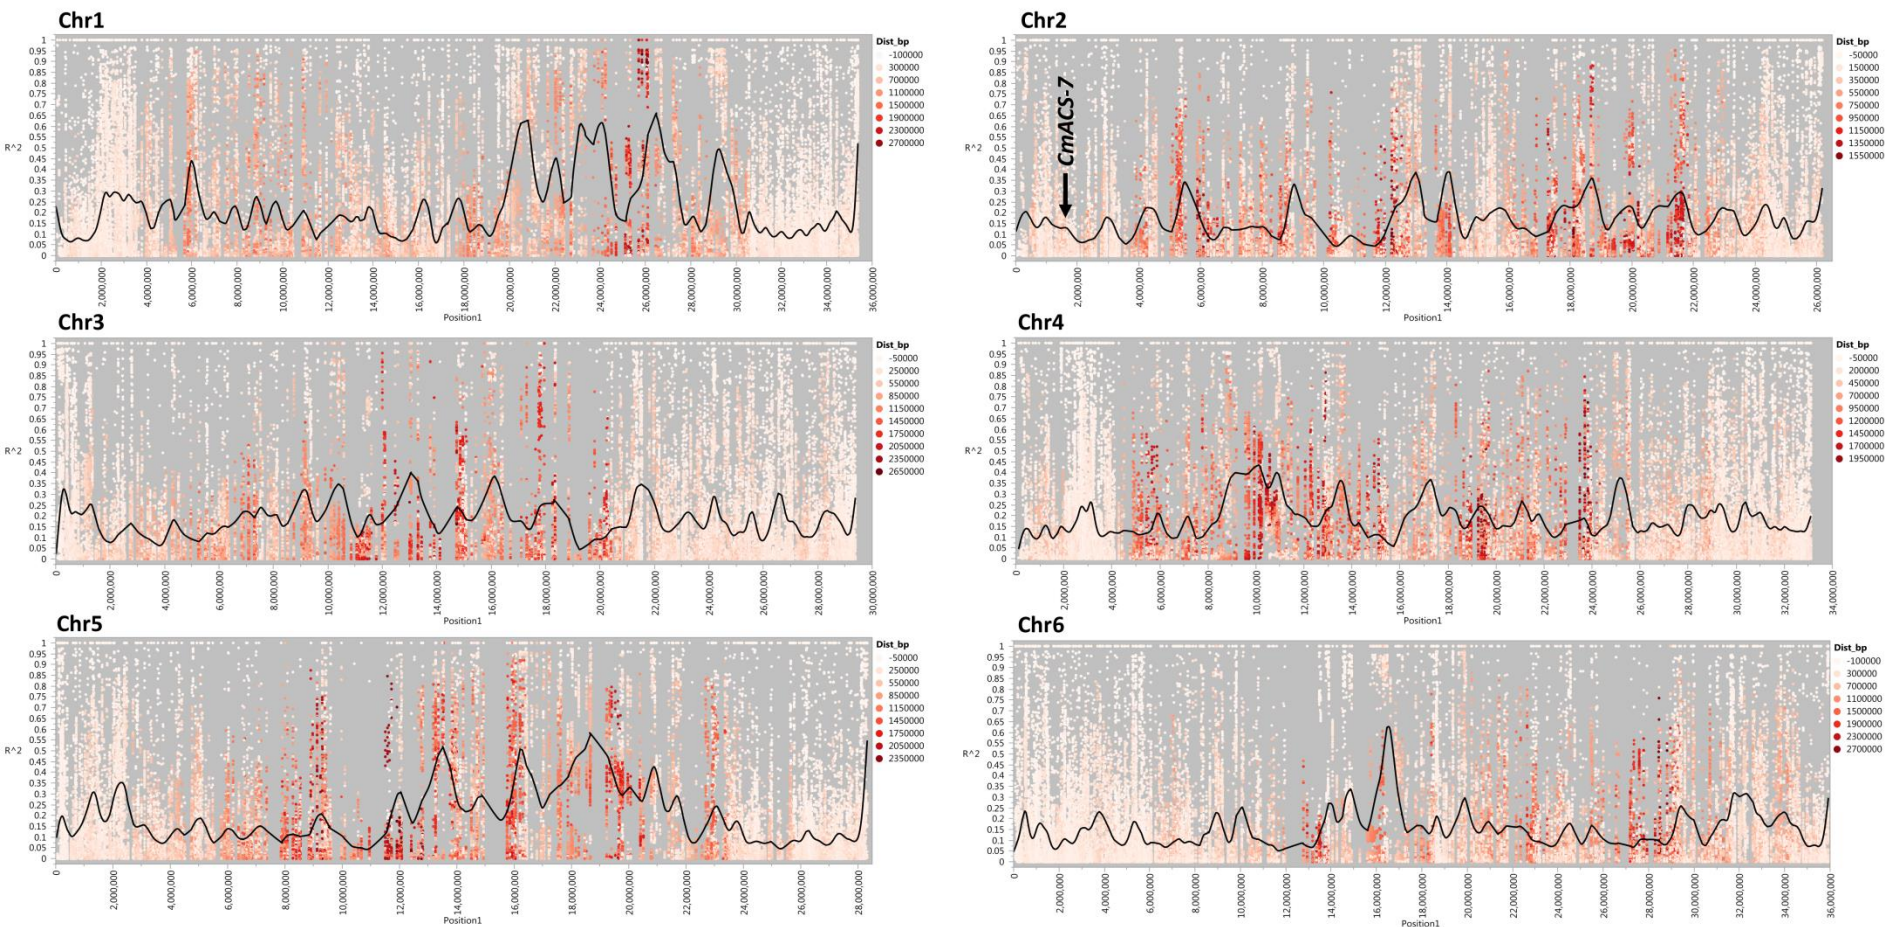

**Supplementary Figure S2: LD ( $R^2$ ) by physical position across 12 melon chromosomes.**

LD between intra-chromosomal SNP pairs is plotted (Y axis) by the physical genomic position of first SNP in each pair. Distance between SNPs in each pair is indicated using white-to-red color scale.



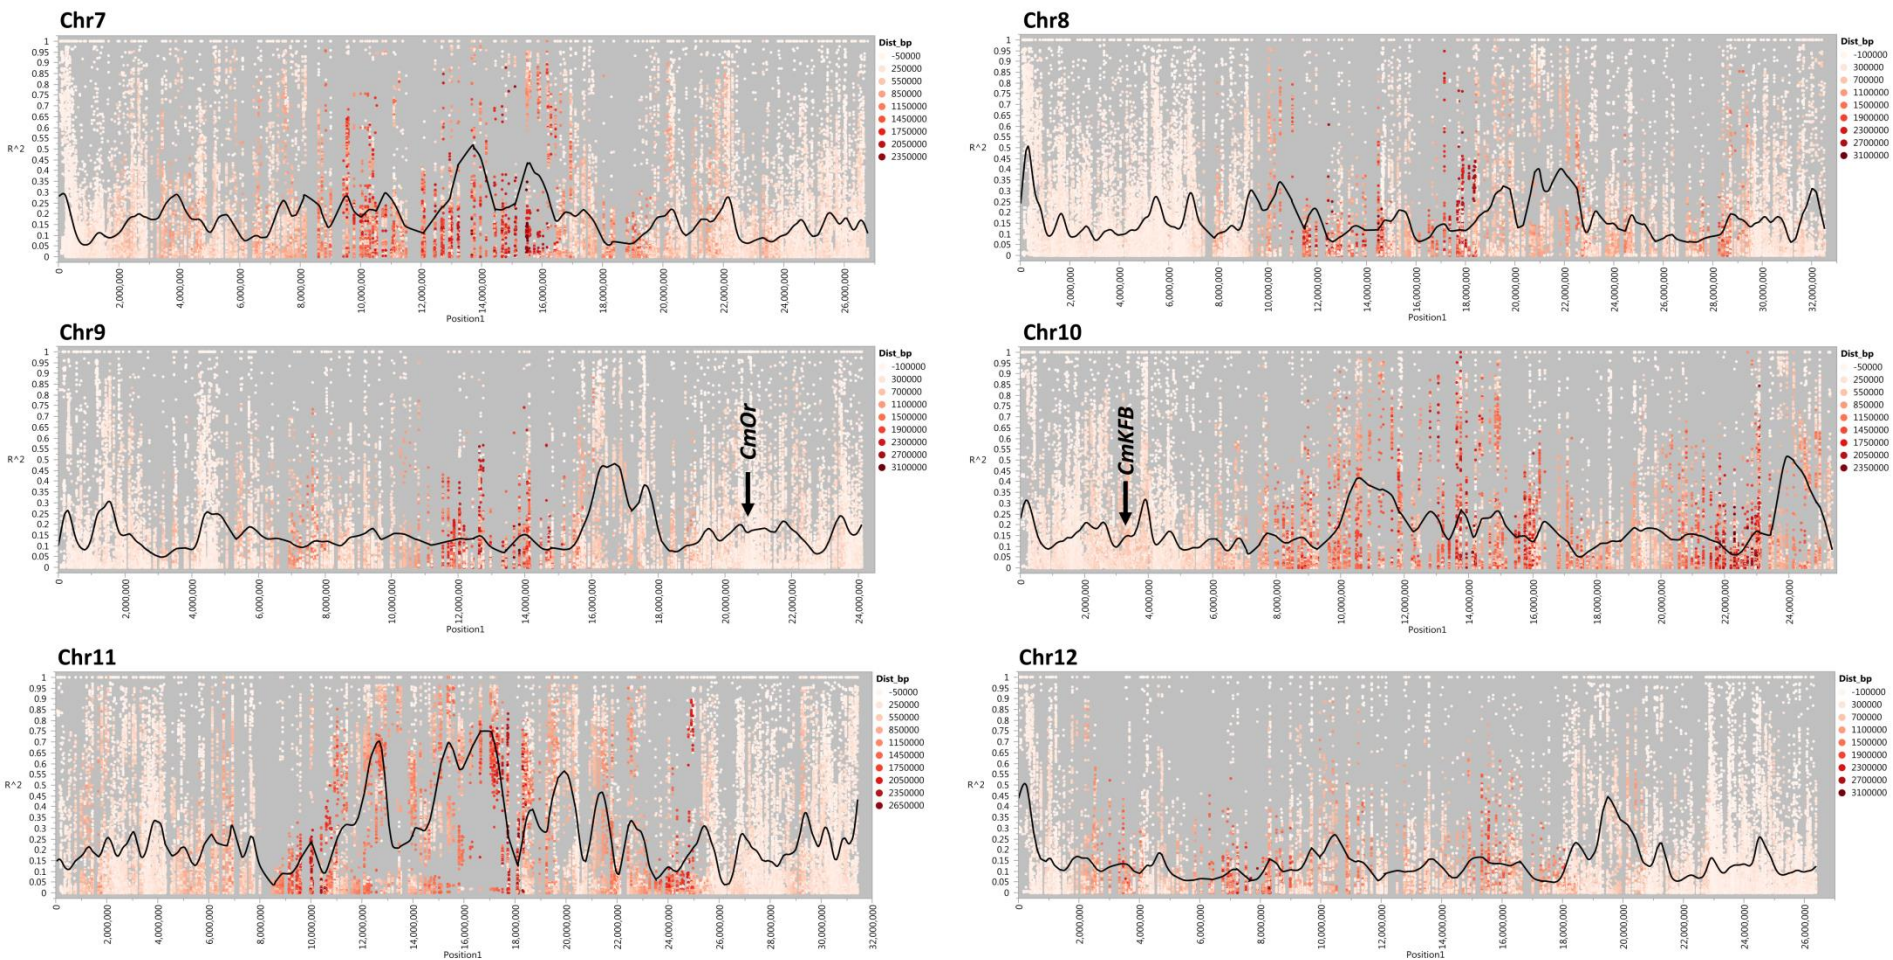

**Supplementary Figure S2: LD ( $R^2$ ) by physical position across 12 melon chromosomes.**

LD between intra-chromosomal SNP pairs is plotted (Y axis) by the physical genomic position of first SNP in each pair. Distance between SNPs in each pair is indicated using white-to-red color scale.



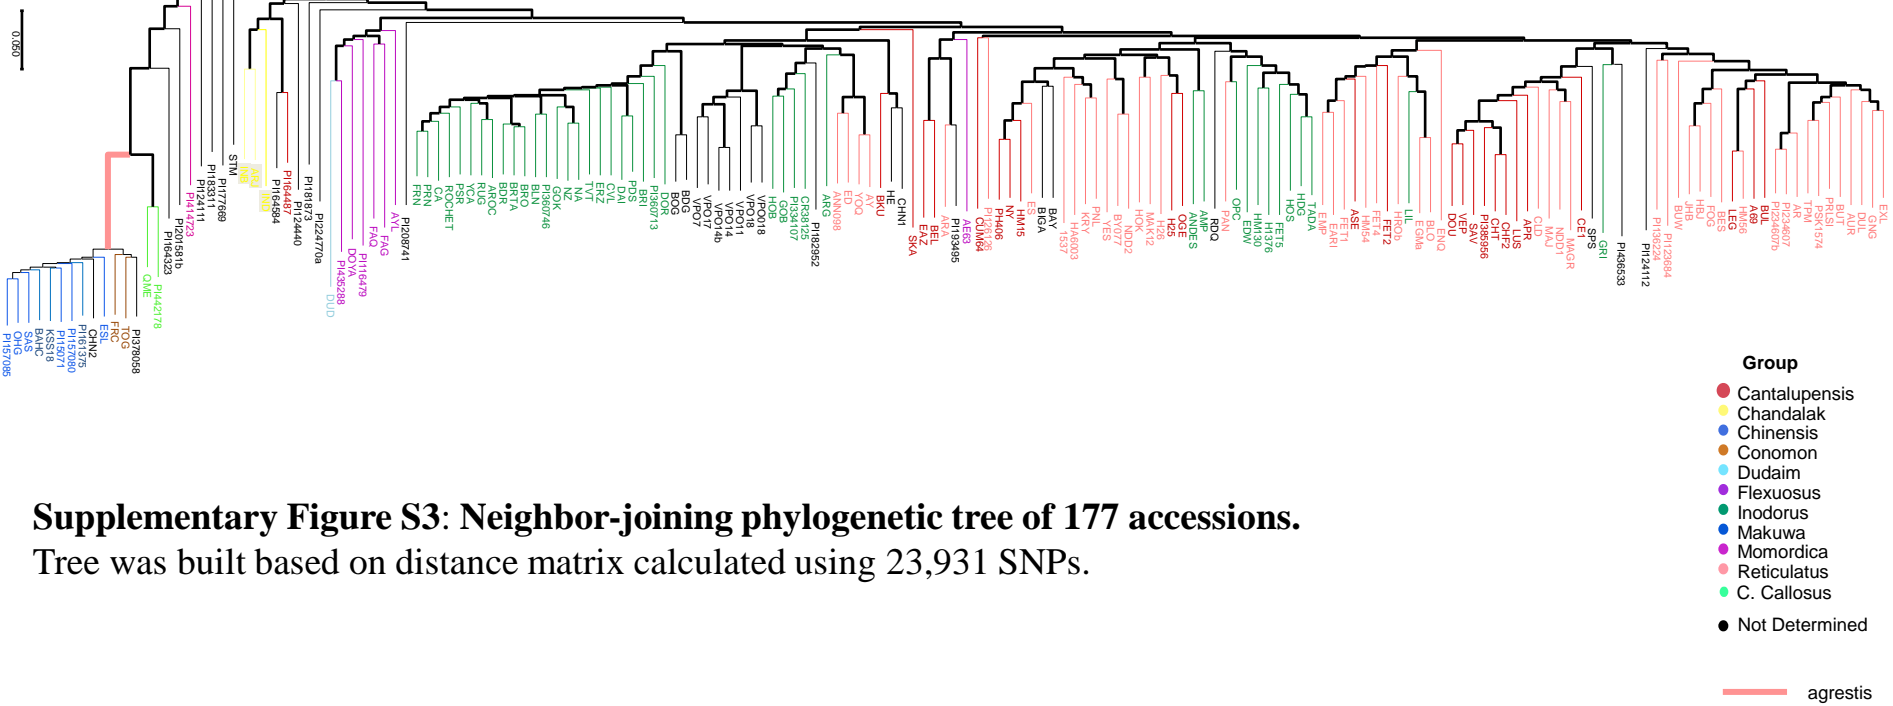

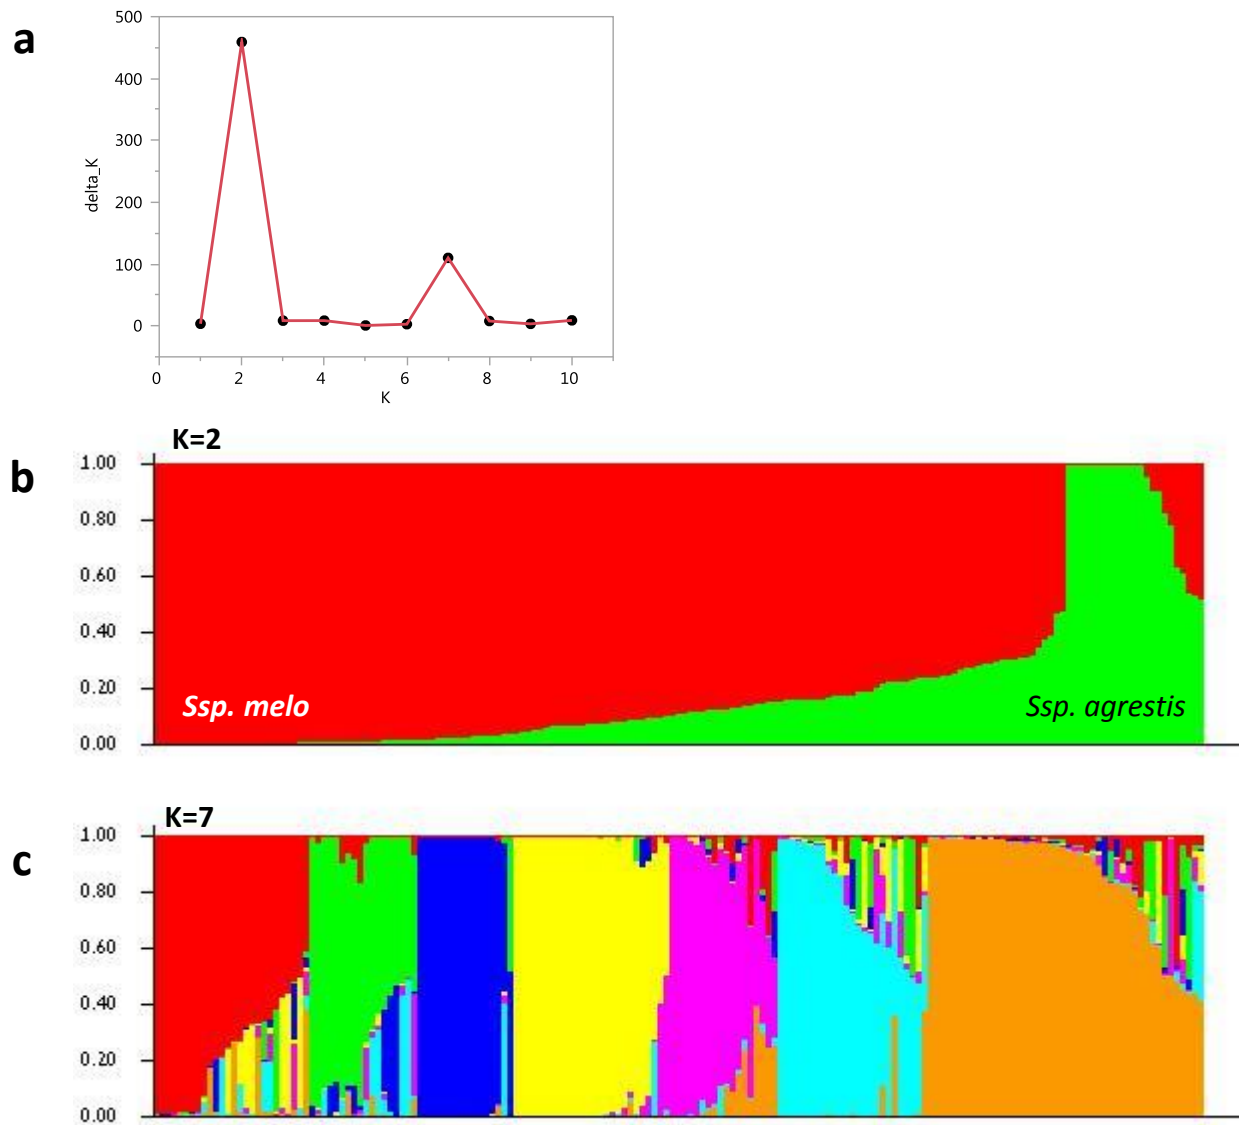

**Supplementary Figure S4: Population structure analysis.** Results are shown for the minimum number of subpopulations (K) which sufficiently define genetic variation. Each individual is represented by a vertical line. **(a)** detection of optimal subpopulations using the delat K method (Reference 62). Plot of delta K for K = 1–10. **(b)** Population structure for K=2, in consensus with the *spp. melo* and *spp. agrestis* division. **(c)** Population structure obtained at K=7.

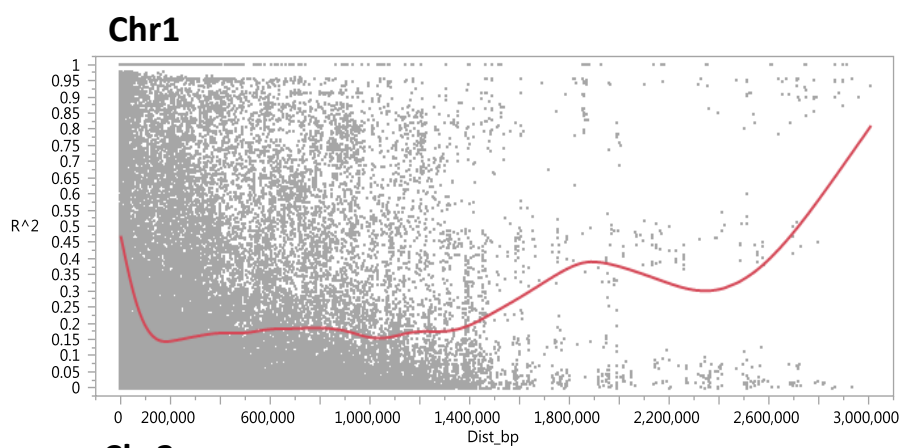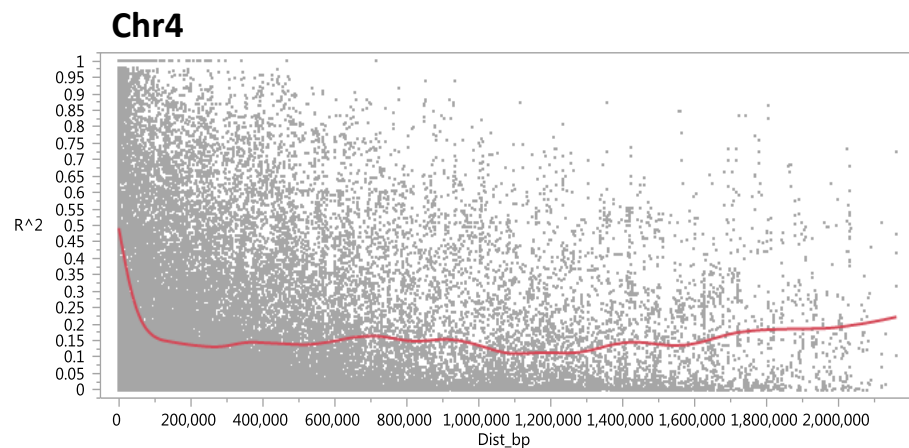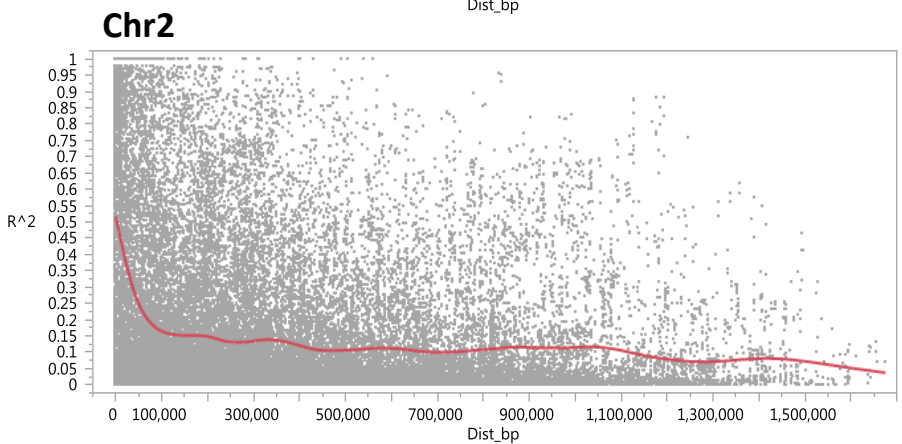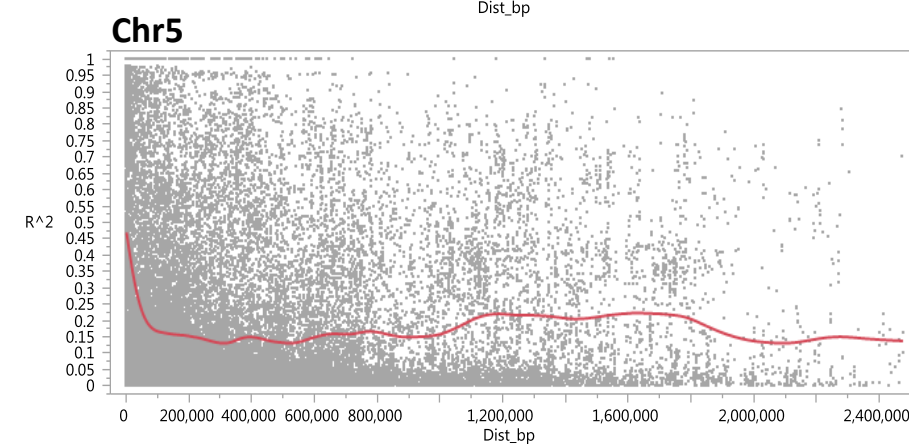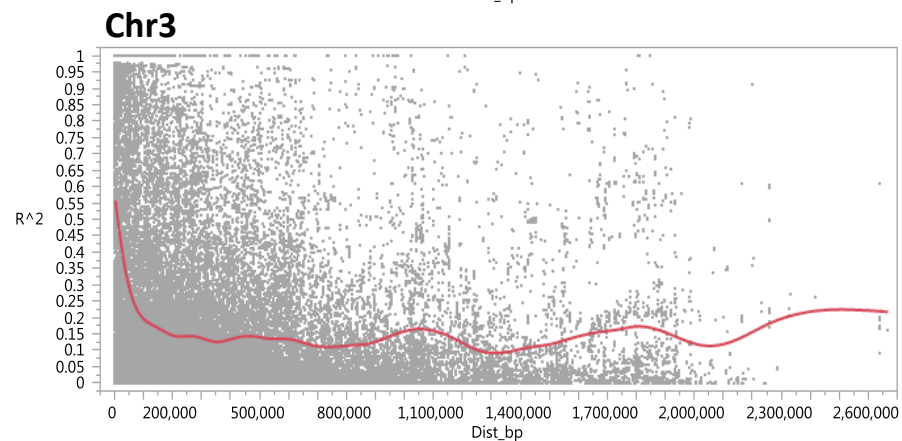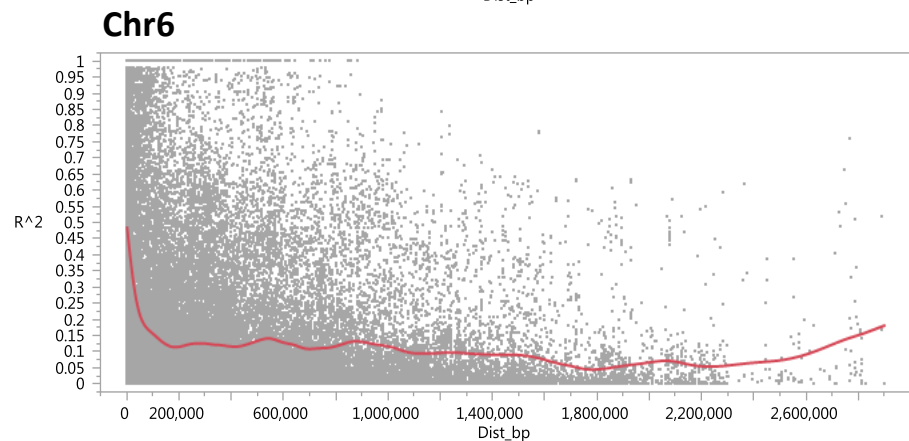

**Supplementary Figure S5a: LD decay plots by chromosomes across 177 accessions.  $R^2$  between intra-chromosomal marker pairs plotted against the physical distance between them.**



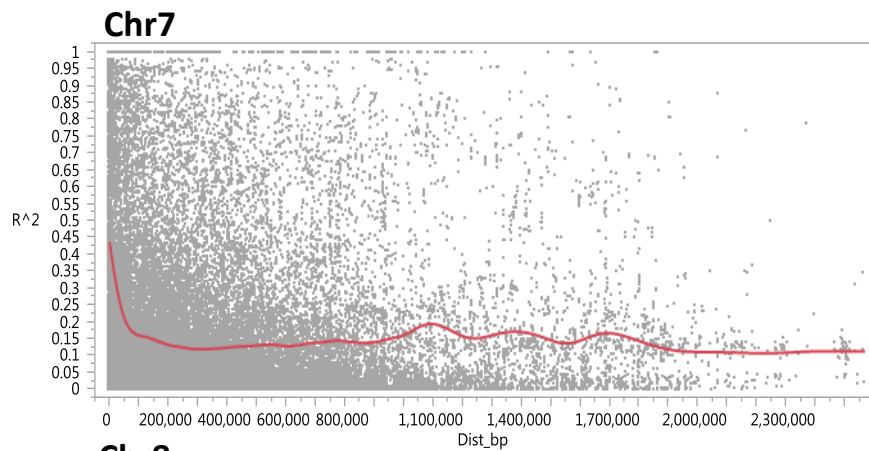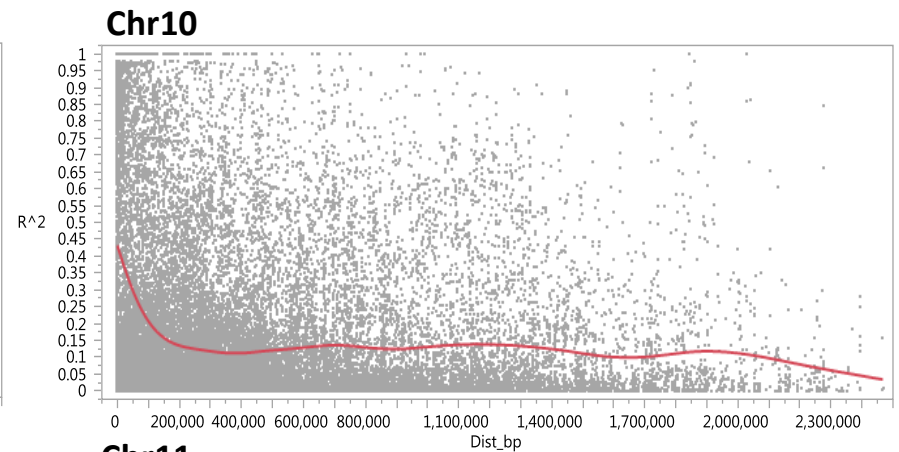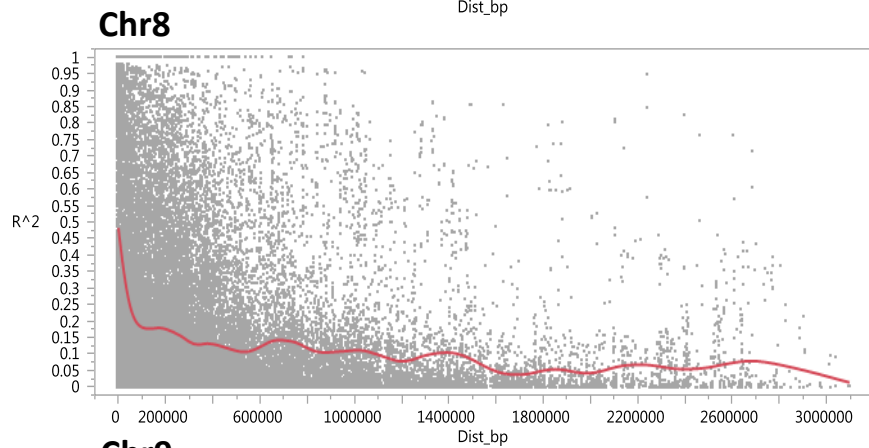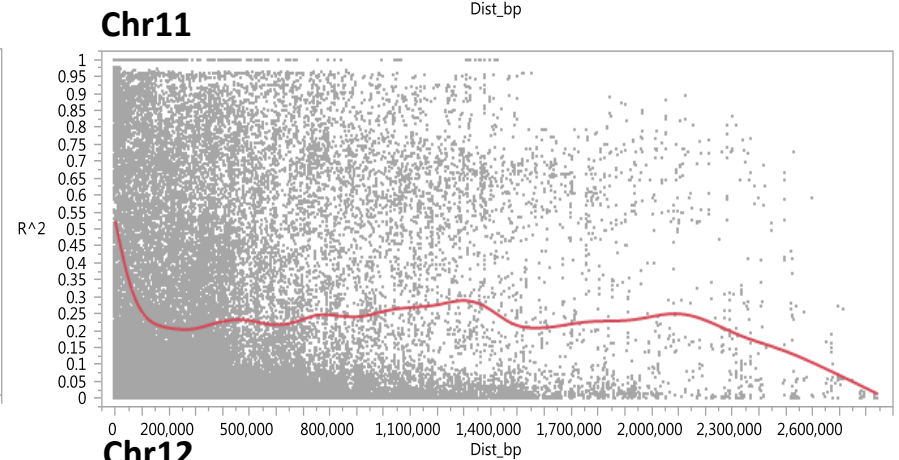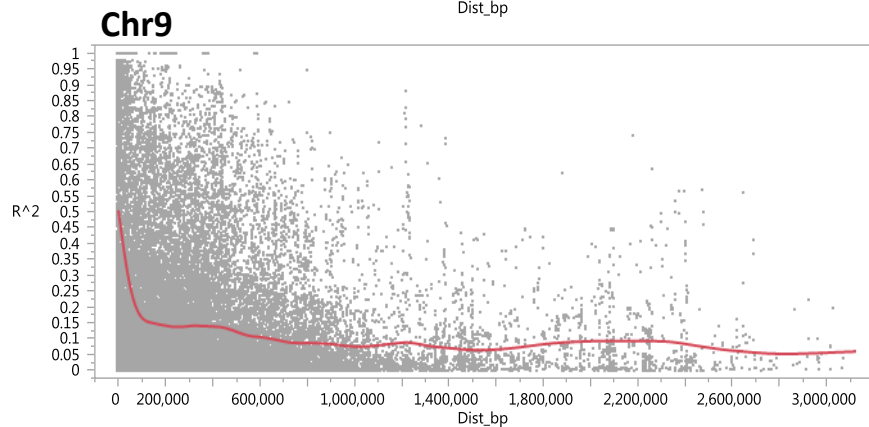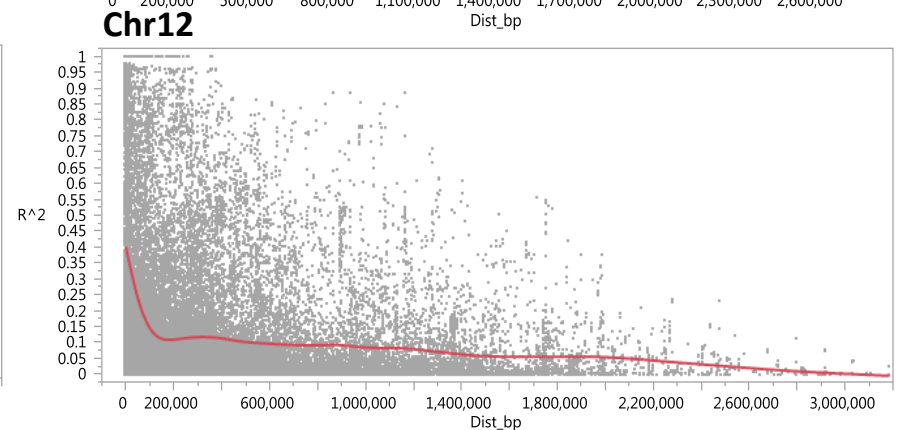

**Supplementary Figure S5a: LD decay plots by chromosomes across 177 accessions. R<sup>2</sup> between intra-chromosomal marker pairs plotted against the physical distance between them.**

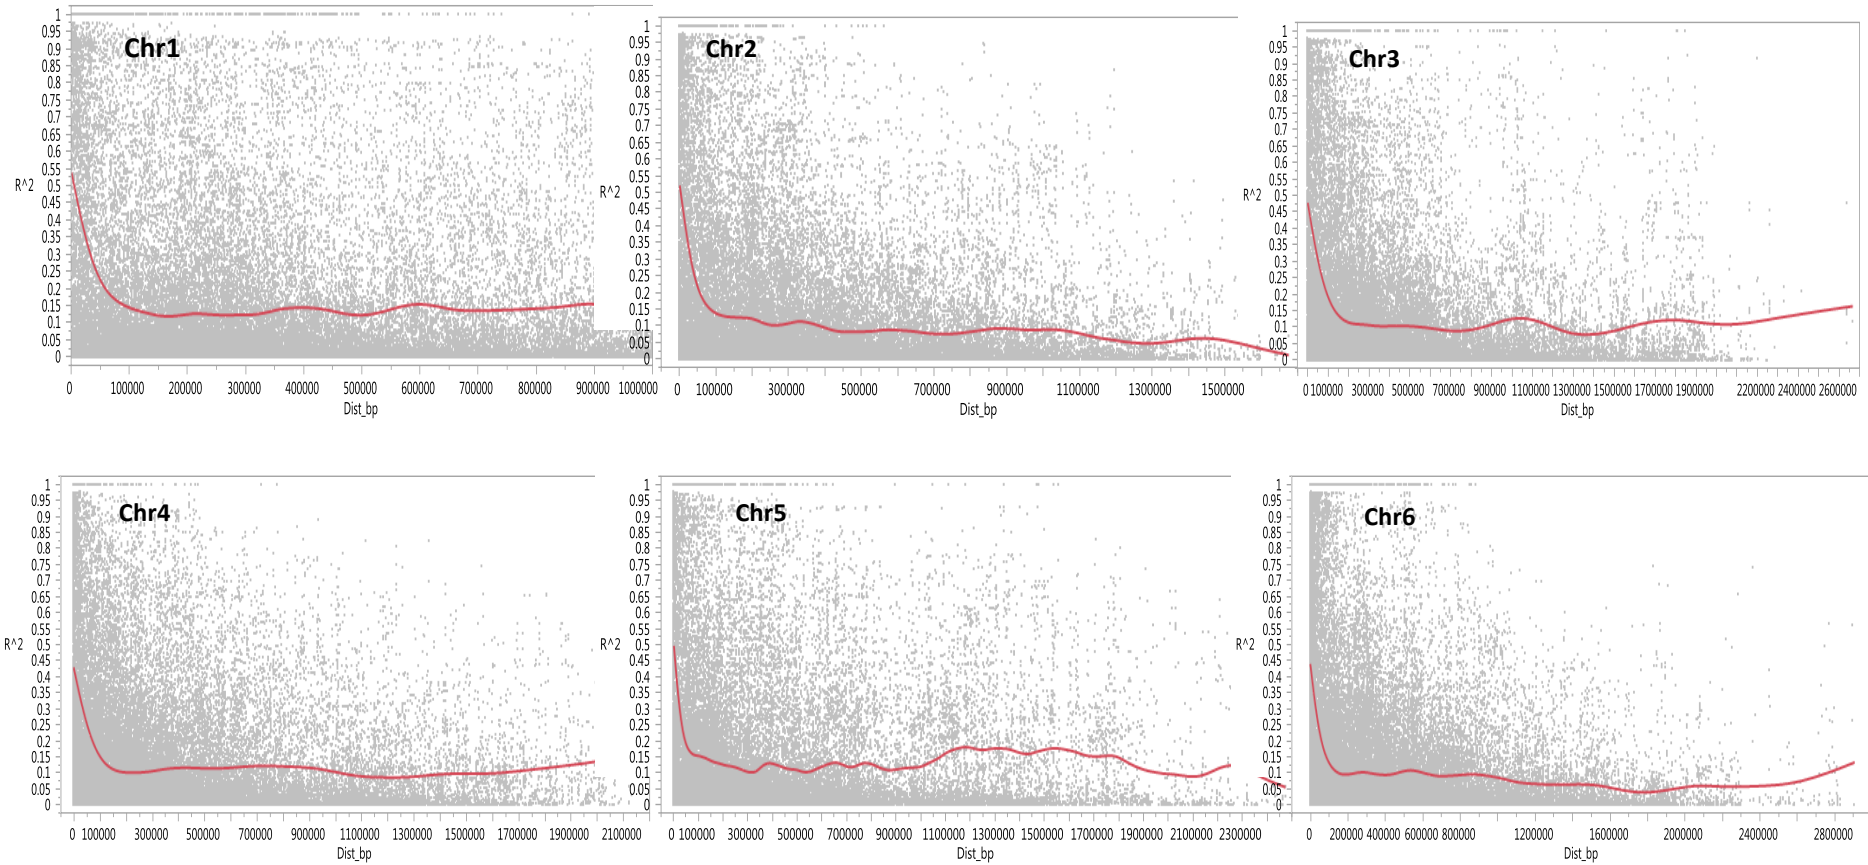

**Supplementary Figure S5b: LD decay plots by chromosomes within the *ssp. melo* group.  $R^2$  between intra-chromosomal marker pairs plotted against the physical distance between them.**

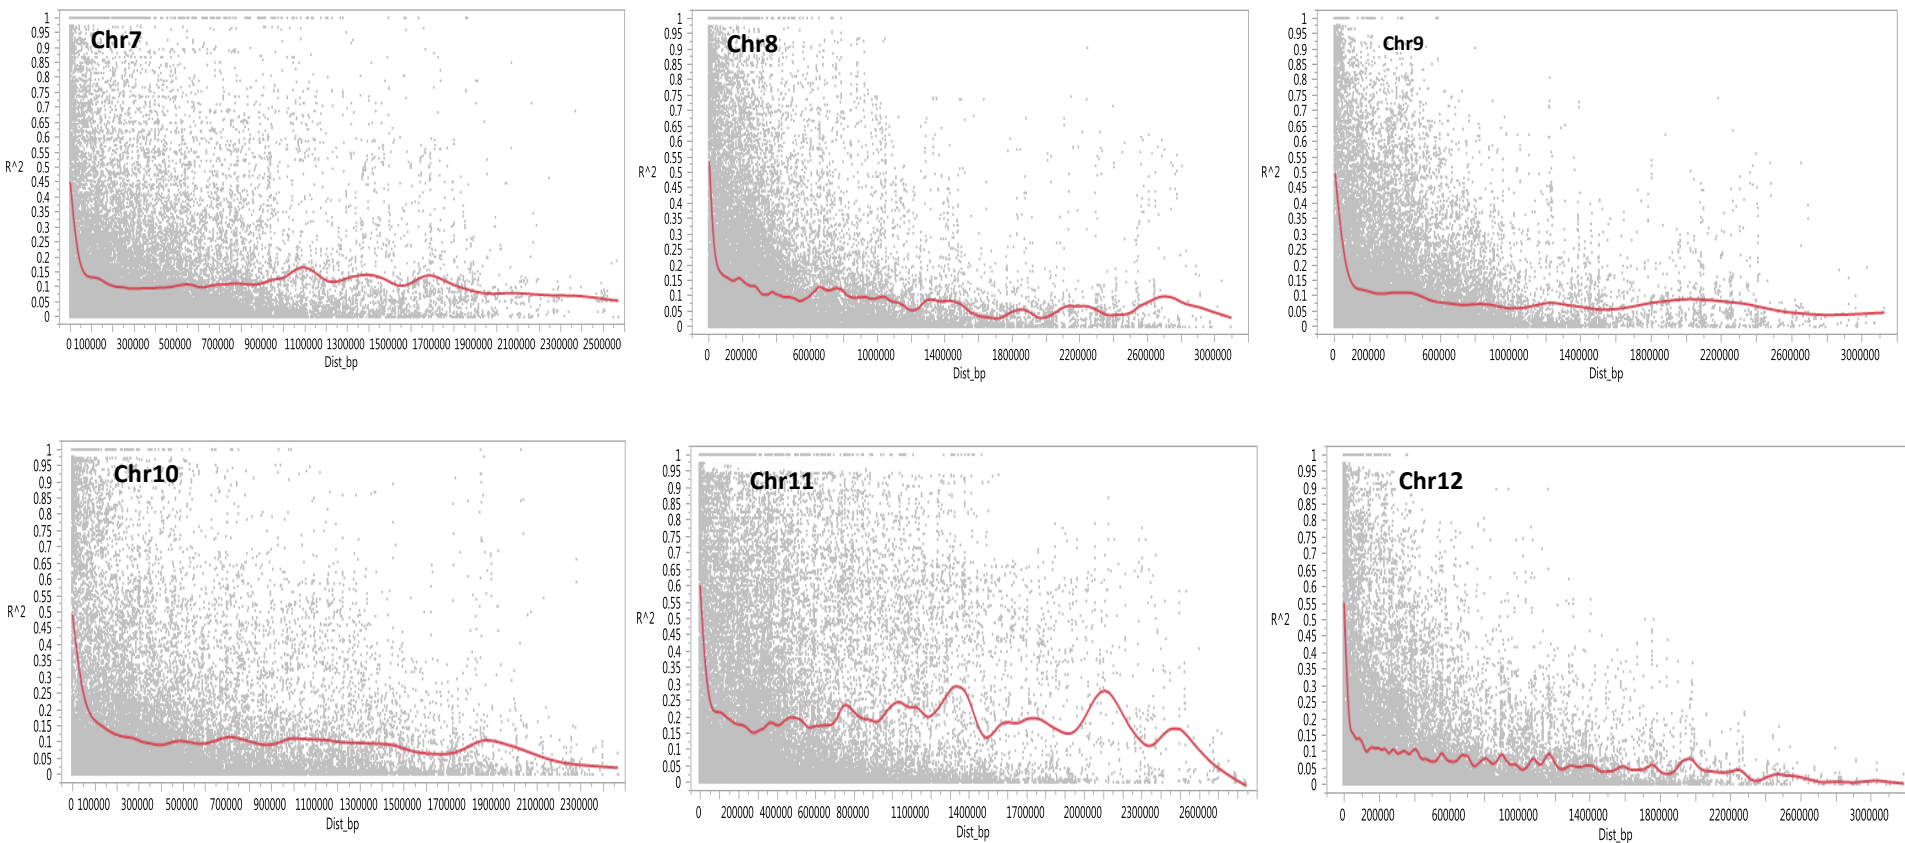

**Supplementary Figure S5b: LD decay plots by chromosomes within the *ssp. melo* group.  $R^2$  between intra-chromosomal marker pairs plotted against the physical distance between them.**



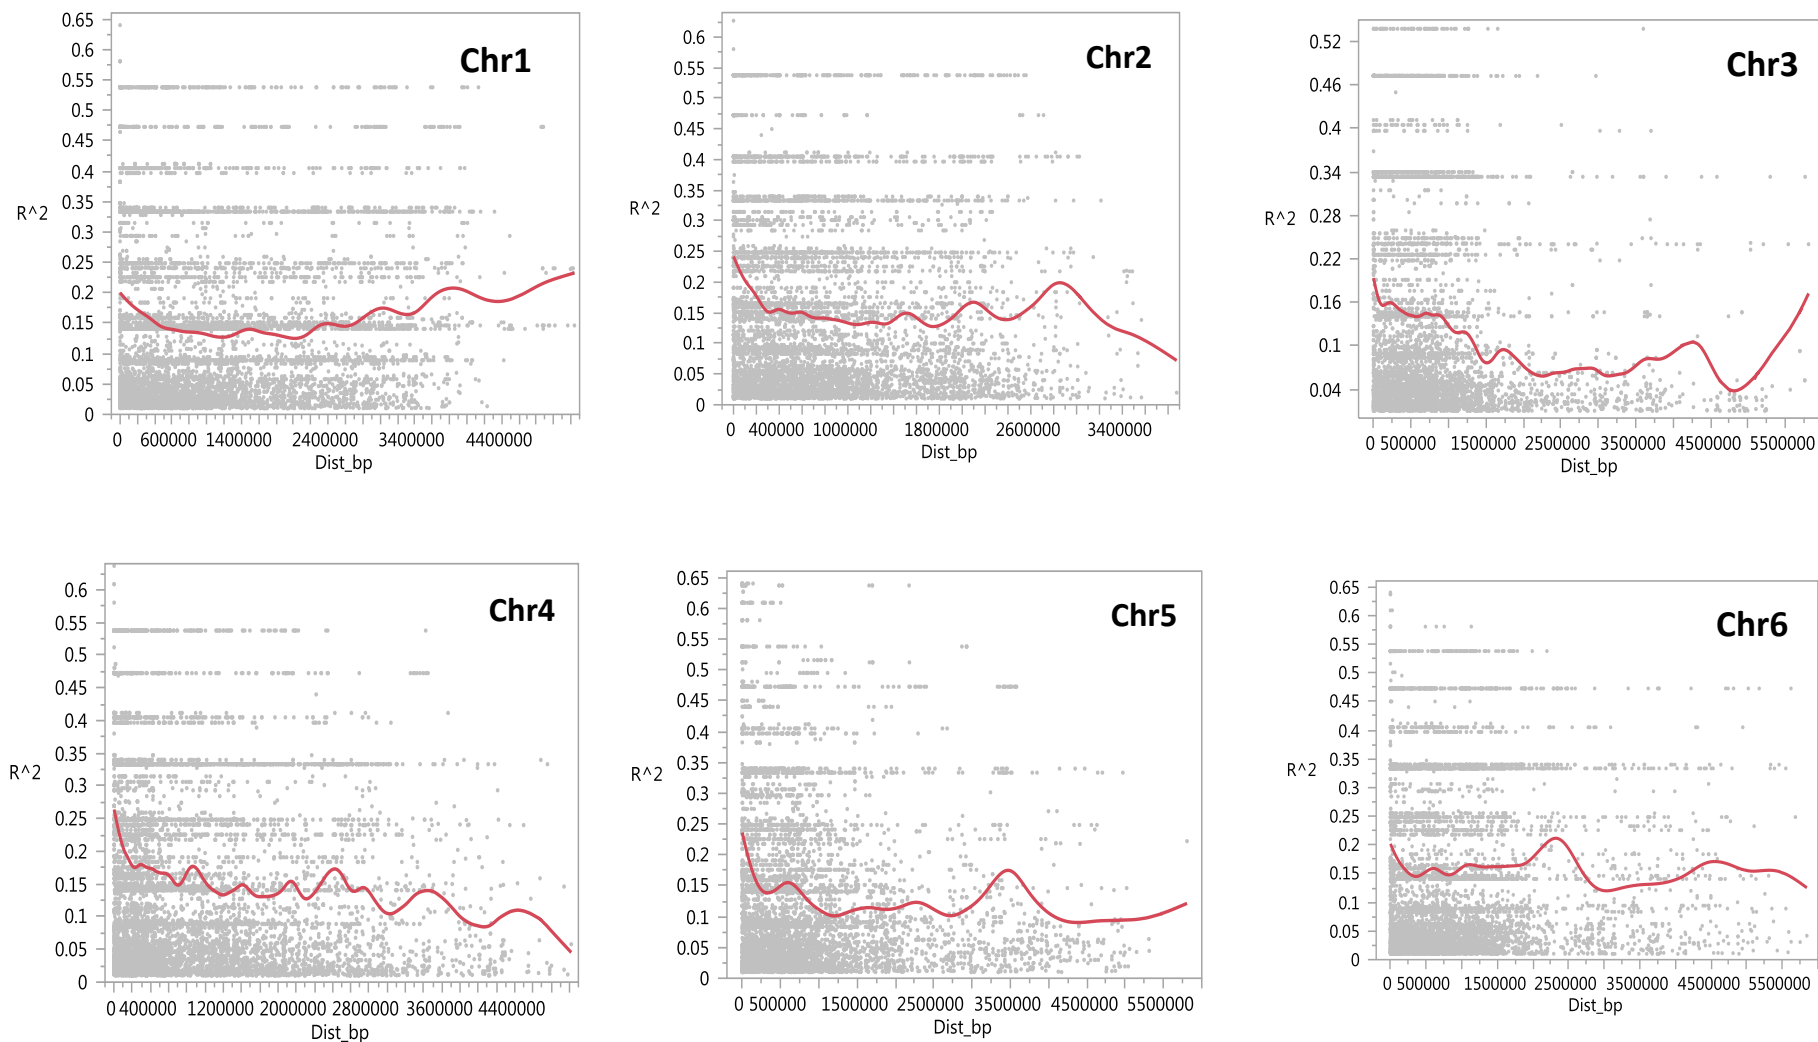

**Supplementary Figure S5c: LD decay plots by chromosomes within the *ssp. agrestis* group.  $R^2$  between intra-chromosomal marker pairs plotted against the physical distance between them.**

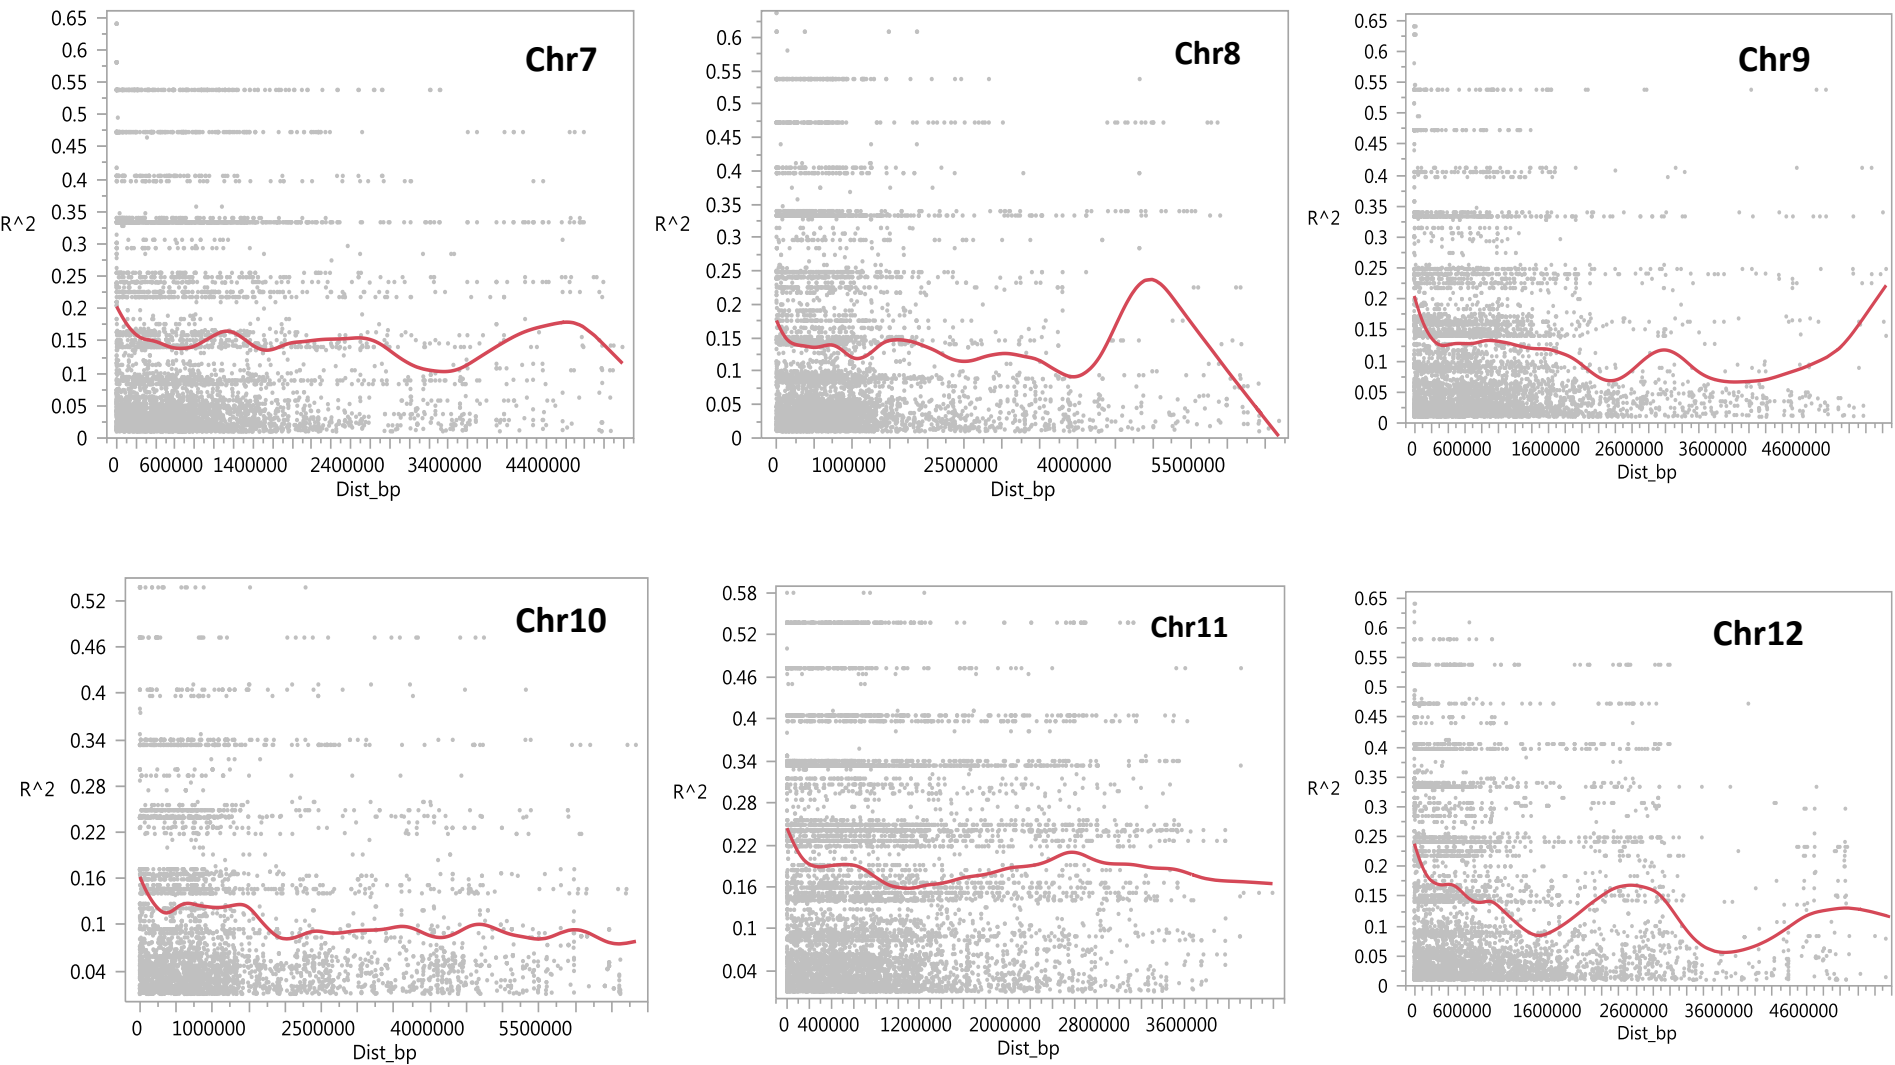

**Supplementary Figure S5c: LD decay plots by chromosomes within the *ssp. agrestis* group.**  $R^2$  between intra-chromosomal marker pairs plotted against the physical distance between them.

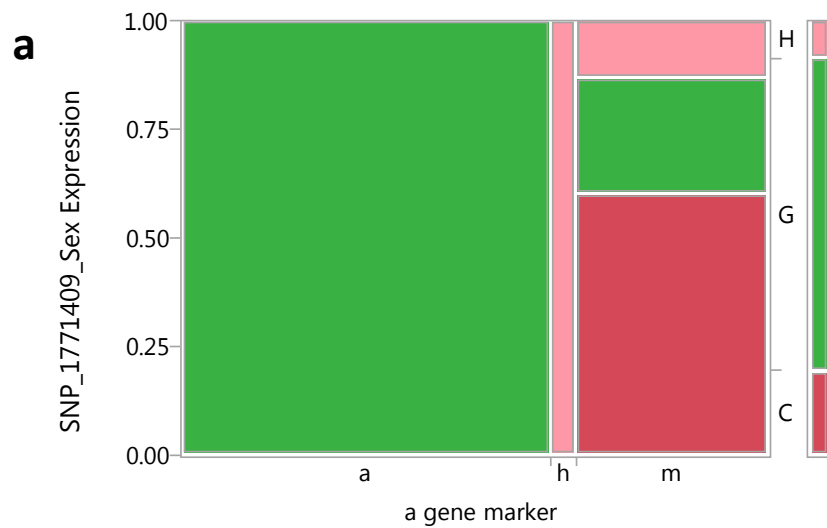

SNP\_1771409\_Sex Expression

**b**

|       | Count   | C      | G      | H      | Total |
|-------|---------|--------|--------|--------|-------|
|       | Total % |        |        |        |       |
|       | Col%    |        |        |        |       |
|       | Row %   |        |        |        |       |
| a     |         | 0      | 29     | 0      | 29    |
|       |         | 0.00   | 63.04  | 0.00   | 63.04 |
|       |         | 0.00   | 87.88  | 0.00   |       |
|       |         | 0.00   | 100.00 | 0.00   |       |
| h     |         | 0      | 0      | 2      | 2     |
|       |         | 0.00   | 0.00   | 4.35   | 4.35  |
|       |         | 0.00   | 0.00   | 50.00  |       |
|       |         | 0.00   | 0.00   | 100.00 |       |
| m     |         | 9      | 4      | 2      | 15    |
|       |         | 19.57  | 8.70   | 4.35   | 32.61 |
|       |         | 100.00 | 12.12  | 50.00  |       |
|       |         | 60.00  | 26.67  | 13.33  |       |
| Total |         | 9      | 33     | 4      | 46    |
|       |         | 19.57  | 71.74  | 8.70   |       |

a gene marker

**Figure S6: Validation of SNP\_1771409 for flower sex-expression through alignment with PCR marker at the *CmACS-7* gene (MELO3C015444, Boualem et al. 2008). (a) Mosaic plot of segregation of the two markers. (b) contingency table of segregation data**



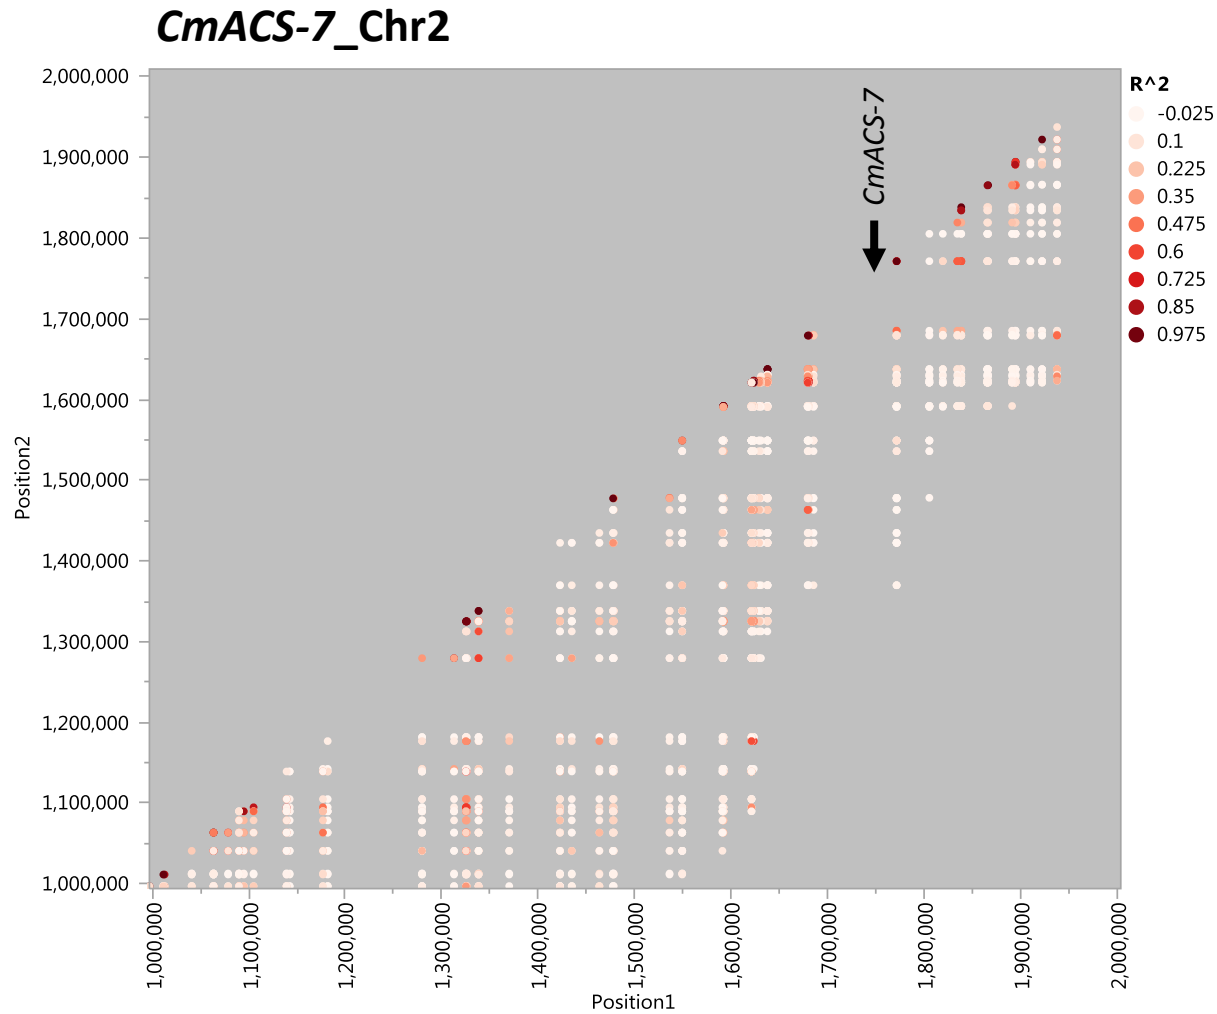

**Supplementary Figure S7: LD distribution plot in a 1,000,000 bp interval surrounding the *CmACS-7* gene on chromosome 2.**

LD is expressed as R<sup>2</sup> and color-coded using white-to-Red scale.

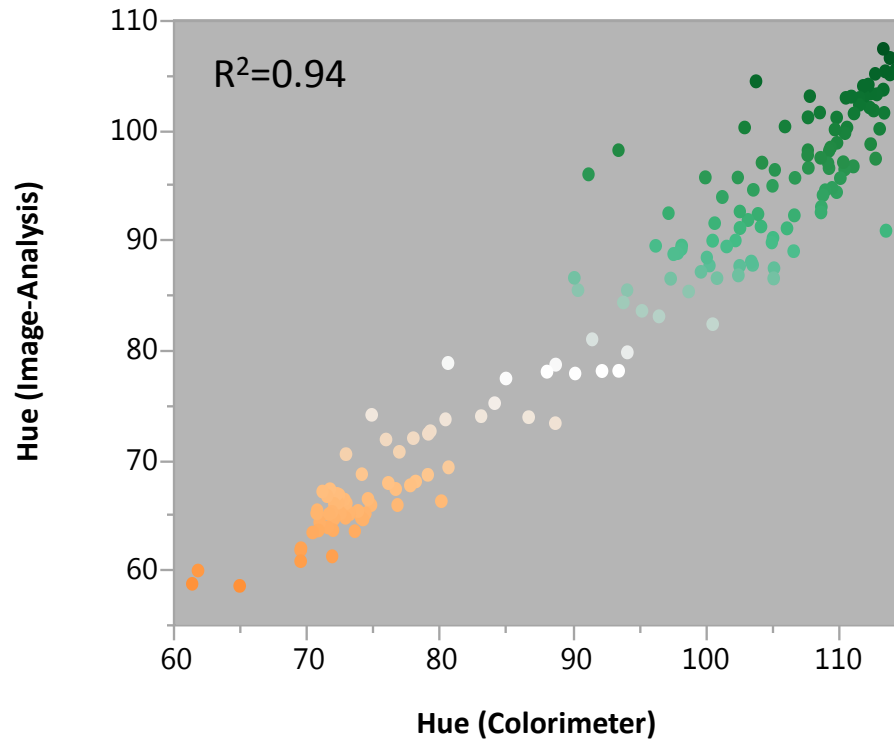

**Supplementary Figure S8: Correlation between fruit flesh hue, measured using colorimeter (X axis) and through fruit image analyses (Y axis).**

Fruit basis;  $H^2=0.95$

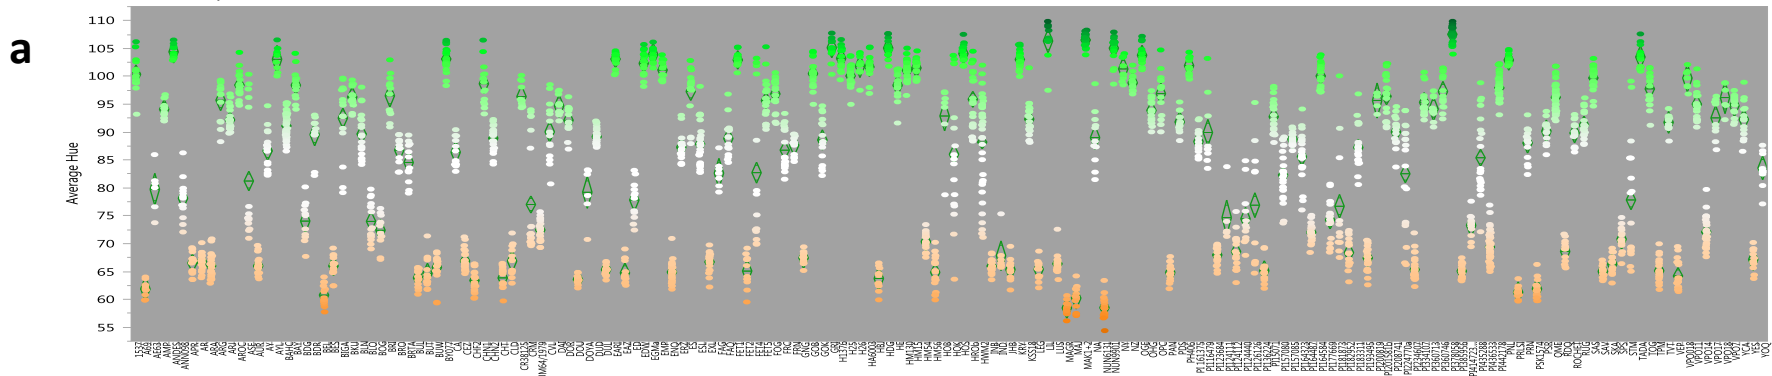

Plot basis;  $H^2=0.96$

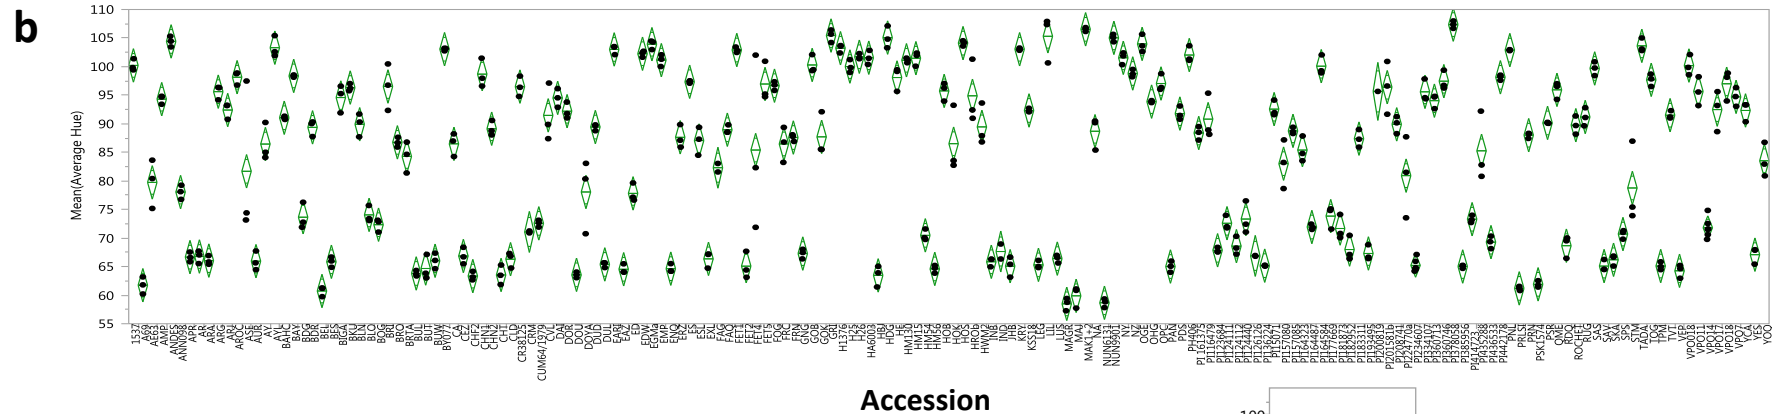

**c**

| REML Variance Component Estimates |                  |                  |                  |                  |                  |               |
|-----------------------------------|------------------|------------------|------------------|------------------|------------------|---------------|
| Random Effect                     | Var Ratio        | Var Component    | Std Error        | 95% Lower        | 95% Upper        | Pct of Total  |
| Rep                               | 0.005122         | 0.0613497        | 0.0741873        | -0.084055        | 0.2067541        | 0.027         |
| <b>Accession</b>                  | <b>17.643397</b> | <b>211.32736</b> | <b>22.806405</b> | <b>166.62763</b> | <b>256.02709</b> | <b>94.610</b> |
| Residual                          |                  | 11.977703        | 0.3211469        | 11.372371        | 12.632928        | 5.362         |
| Total                             |                  | 223.36641        | 22.808432        | 184.62751        | 275.78996        | 100.000       |

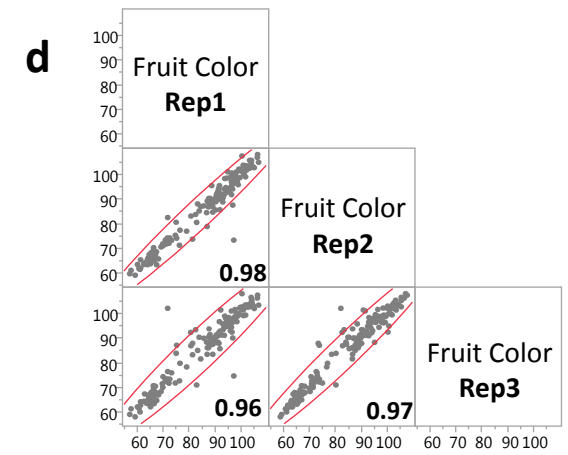

**Supplementary Figure S9: Properties of flesh color variation .** (a) one-way ANOVA at the fruit basis. (b) one-way ANOVA at the plot basis. (c) variation components table for the fruit basis ANOVA. (d) correlation between replications for plot means.



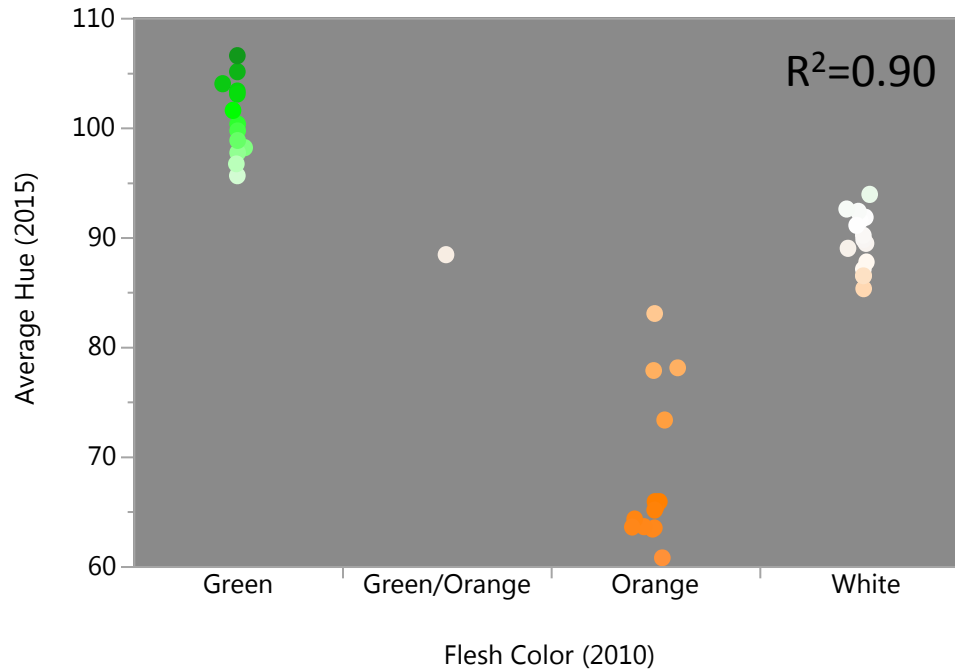

**Supplementary Figure S10: repeatability of flesh color in two different years across 43 diverse accessions.**

Each point represent accession mean. X axis are flesh color classes scores on the Summer 2010 experiment. On the Y axis are flesh color quantitative data collected from digital fruit images on Summer 2016 (see materials and methods).

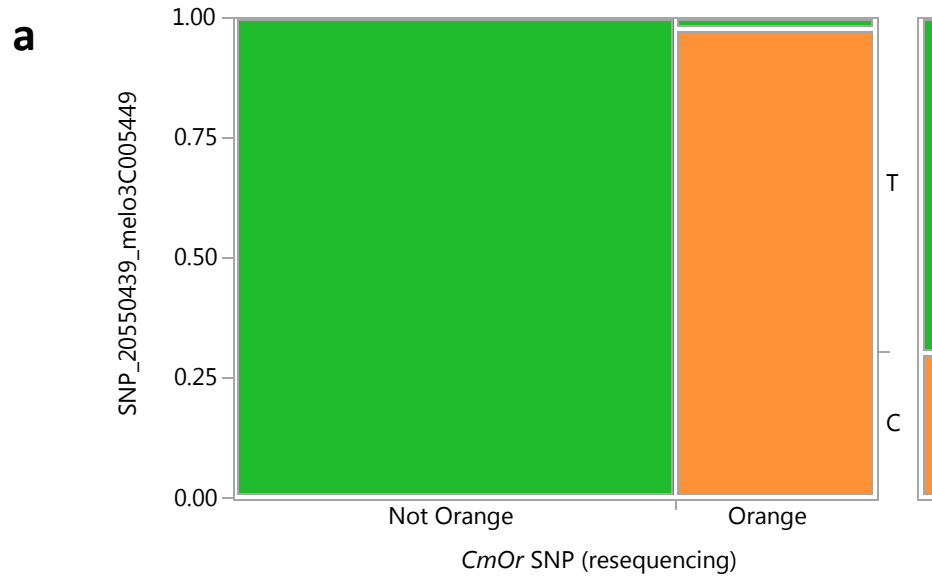

SNP\_20550439\_melo3C005449

**b**

| Count      | C                              | T                              | Total       |
|------------|--------------------------------|--------------------------------|-------------|
| Total %    |                                |                                |             |
| Col %      |                                |                                |             |
| Row %      |                                |                                |             |
| Not Orange | 0<br>0.00<br>0.00<br>0.00      | 91<br>68.94<br>98.91<br>100.00 | 91<br>68.94 |
| Orange     | 40<br>30.30<br>100.00<br>97.56 | 1<br>0.76<br>1.09<br>2.44      | 41<br>31.06 |
| Total      | 40<br>30.30                    | 92<br>69.70                    | 132         |

*CmOr* SNP (resequencing)

**Figure S11: Validation of SNP\_20550439 for flesh color through alignment with resequencing-based SNP at the *CmOr* gene (melo3C005449, Tzuri et al. 2015). (a) Mosaic plot of segregation of the two markers. (b) contingency table of segregation data**

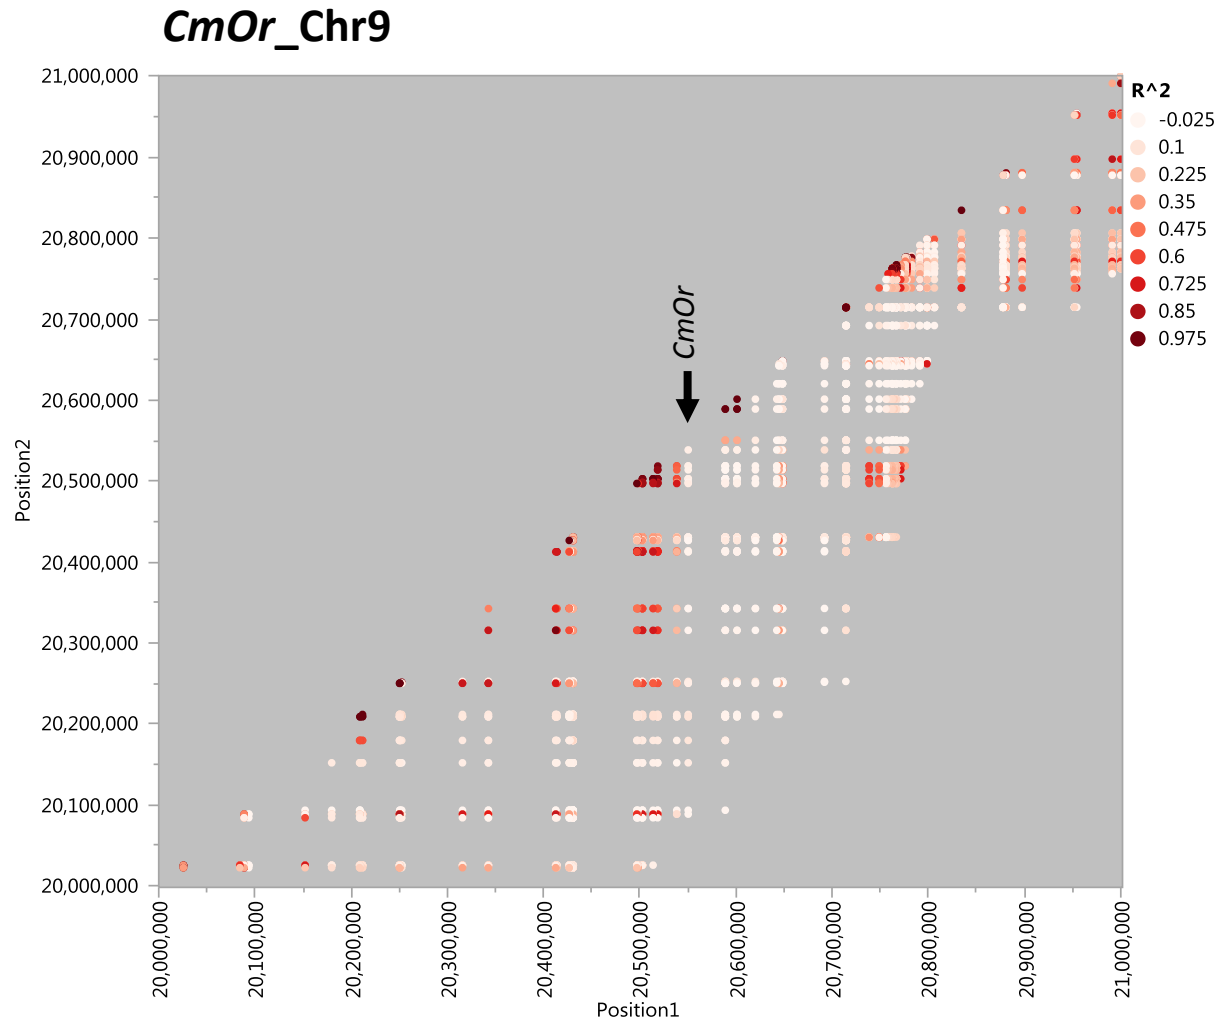

**Supplementary Figure S12: LD distribution plot in a 1,000,000 bp interval surrounding the *CmOr* gene on chromosome 9.**

LD is expressed as  $R^2$  and color-coded using white-to-Red scale.

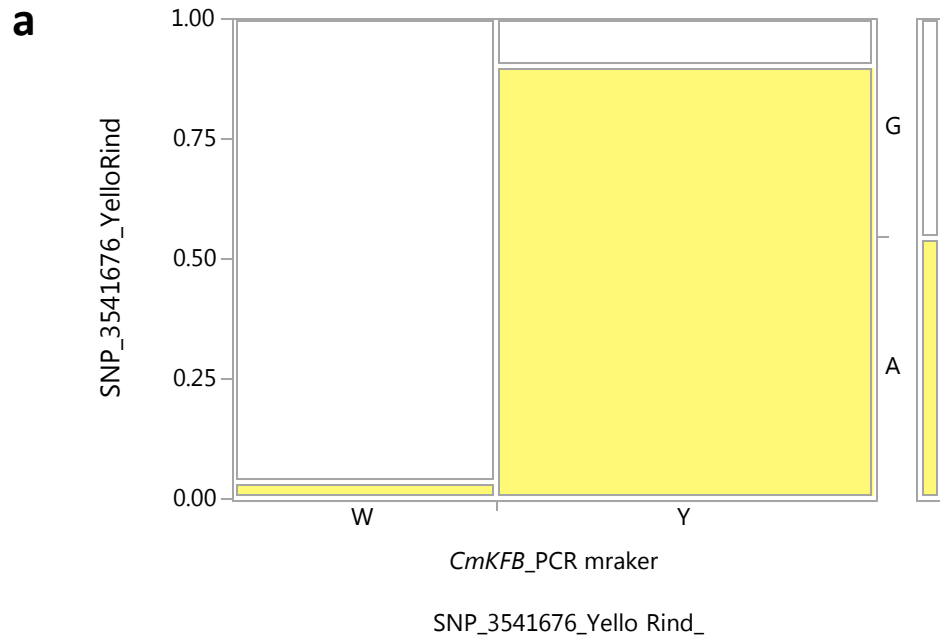

**b**

| CmKFB_PCR Marker | Count   |       |       |       |
|------------------|---------|-------|-------|-------|
|                  | Total % | A     | G     | Total |
|                  | Col %   |       |       |       |
|                  | Row %   |       |       |       |
| W                |         | 1     | 27    | 28    |
|                  |         | 1.47  | 39.71 | 41.18 |
|                  |         | 2.70  | 87.10 |       |
|                  |         | 3.57  | 96.43 |       |
| Y                |         | 36    | 4     | 40    |
|                  |         | 52.94 | 5.88  | 58.82 |
|                  |         | 97.30 | 12.90 |       |
|                  |         | 90.00 | 10.00 |       |
| Total            |         | 37    | 31    | 68    |
|                  |         | 54.41 | 45.59 |       |

**Figure S13: Validation of SNP\_3541676 for flesh color through alignment with PCR marker scoring an INDEL at the *CmKFB* gene (MELO3C11980, Feder et al. 2015). (a) Mosaic plot of segregation of the two markers. W=White Allele, Y=Yellow allele. (b) contingency table of segregation data**



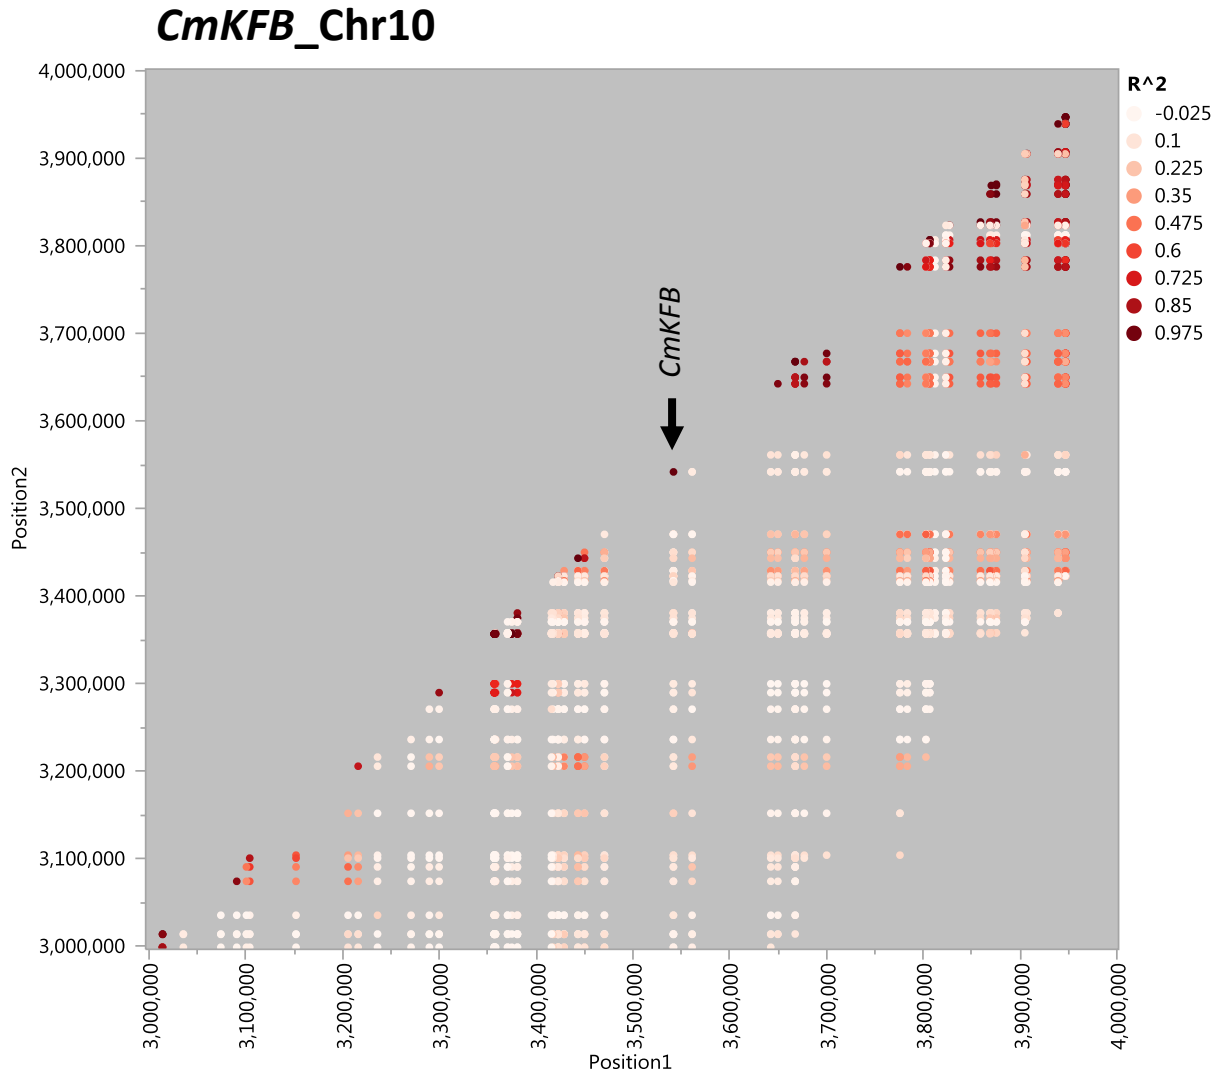

**Supplementary Figure S14:** LD distribution plot in a 1,000,000 bp interval surrounding the *CmKFB* gene on chromosome 10. LD is expressed as  $R^2$  and color-coded using white-to-Red scale.

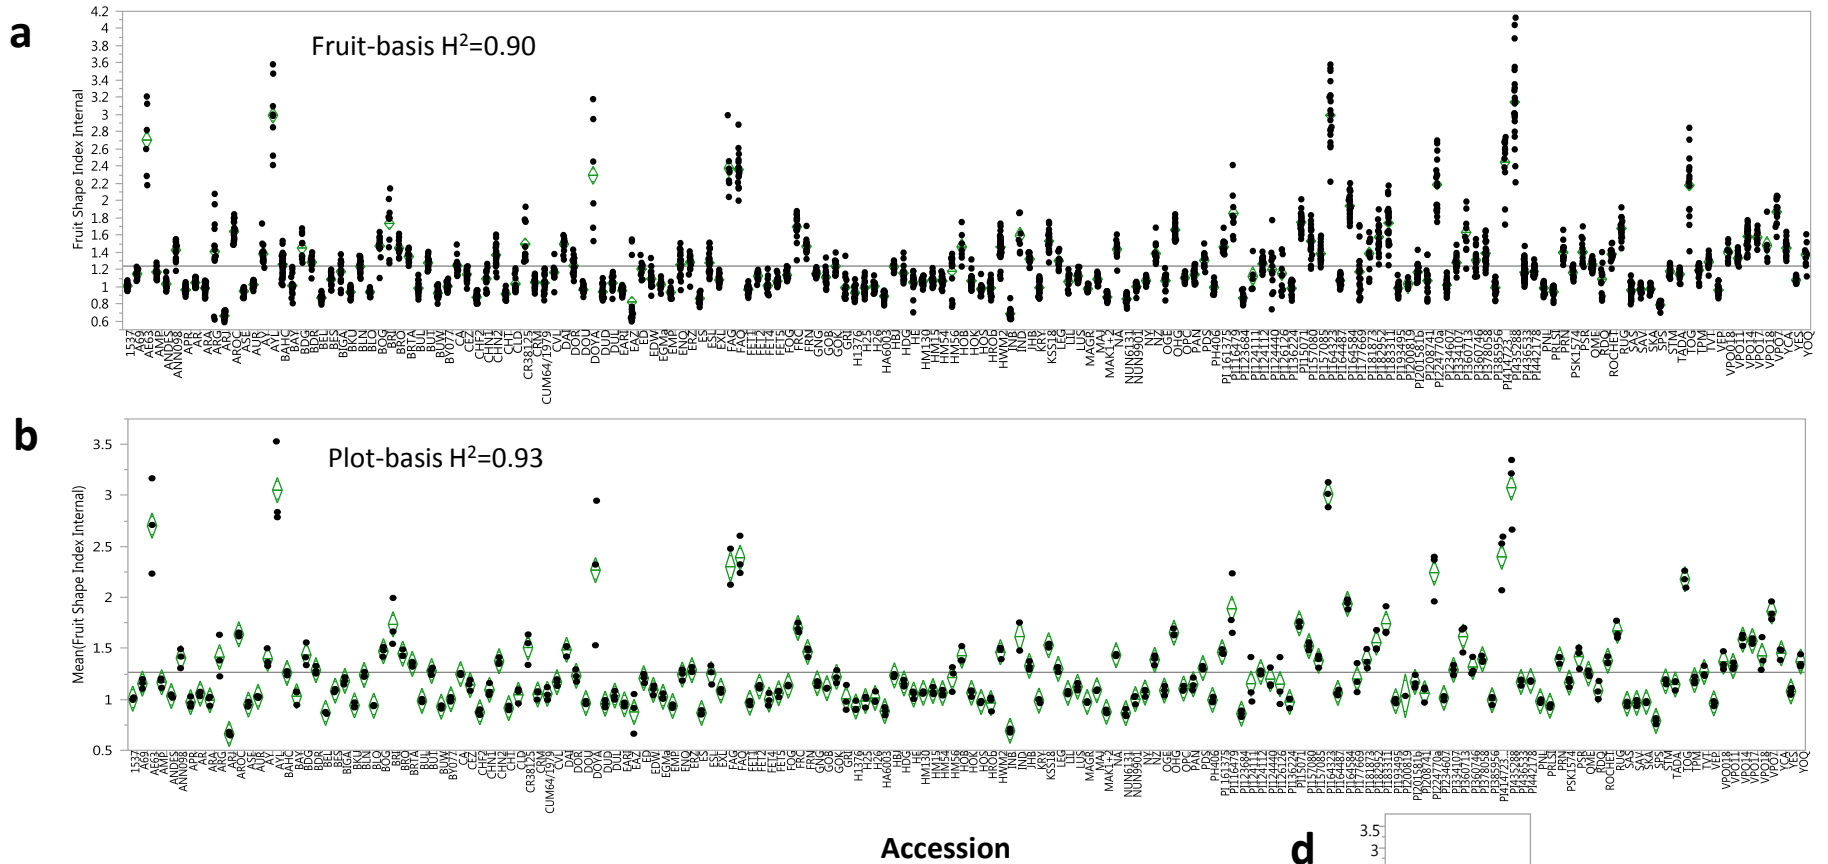

**c**

| REML Variance Component Estimates |                  |                  |                  |                  |                  |               |
|-----------------------------------|------------------|------------------|------------------|------------------|------------------|---------------|
| Random Effect                     | Var              |                  |                  |                  |                  |               |
|                                   | Var Ratio        | Component        | Std Error        | 95% Lower        | 95% Upper        | Pct of Total  |
| Rep                               | 0.0064533        | 0.0001207        | 0.0001404        | -0.000155        | 0.0003959        | 0.065         |
| <b>Accession</b>                  | <b>8.8655302</b> | <b>0.1657838</b> | <b>0.0179868</b> | <b>0.1305303</b> | <b>0.2010372</b> | <b>89.805</b> |
| Residual                          |                  | 0.0186998        | 0.0004998        | 0.0177576        | 0.0197194        | 10.130        |
| Total                             |                  | 0.1846043        | 0.0179929        | 0.1538541        | 0.2256451        | 100.000       |

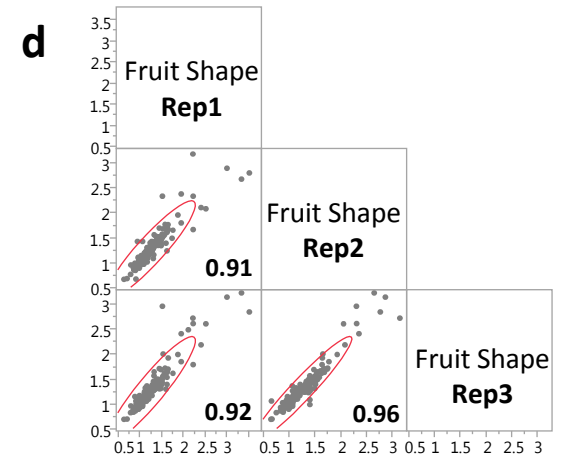

**Supplementary Figure S15: Properties of fruit shape variation .** (a) one-way ANOVA at the fruit basis. (b) one-way ANOVA at the plot basis. (c) variation components table for the fruit basis ANOVA. (d) correlation between replications for plot means.

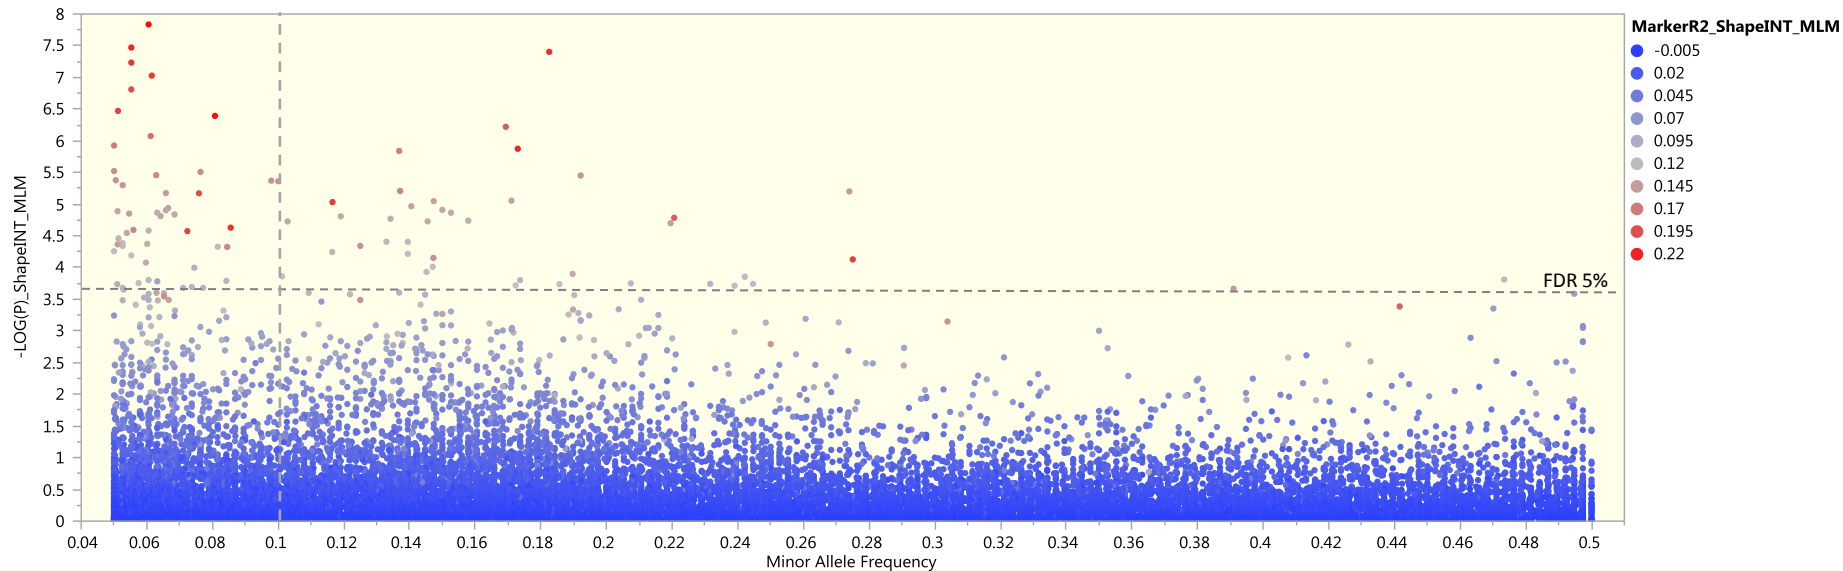

**Supplementary Figure S16:** Polymorphism effect size for fruit shape index and allele frequencies. SNP allele frequencies plotted against effects on fruit shape index (expressed as  $-\text{Log } P$  values). Effects are also colored based on SNP  $R^2$ .

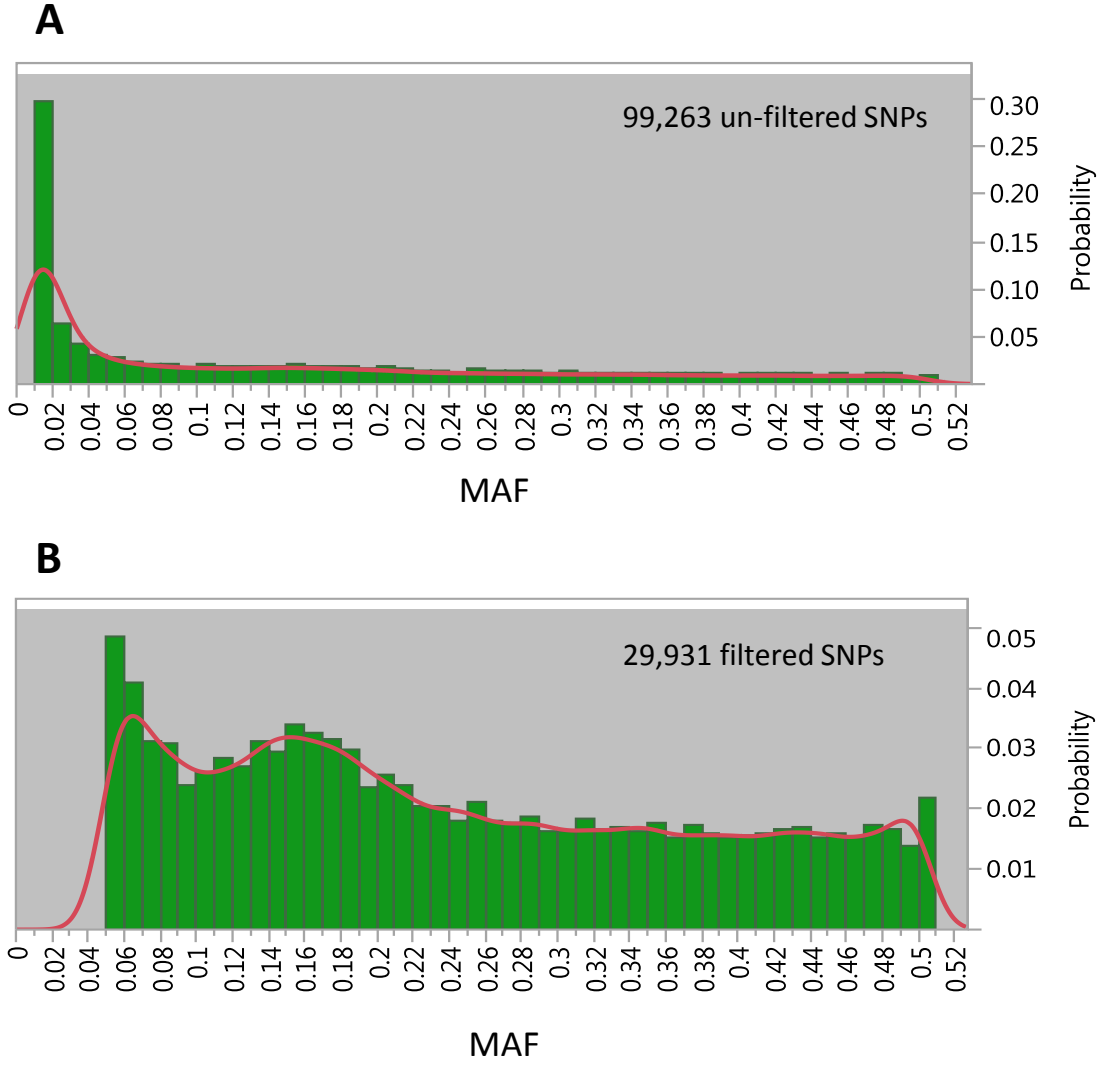

**Supplementary Figure S17: Frequency distribution of minor allele frequencies (MAF).**  
(A) Full set – 99,263 SNPs. (B) Filtered set - 23,931 SNPs.



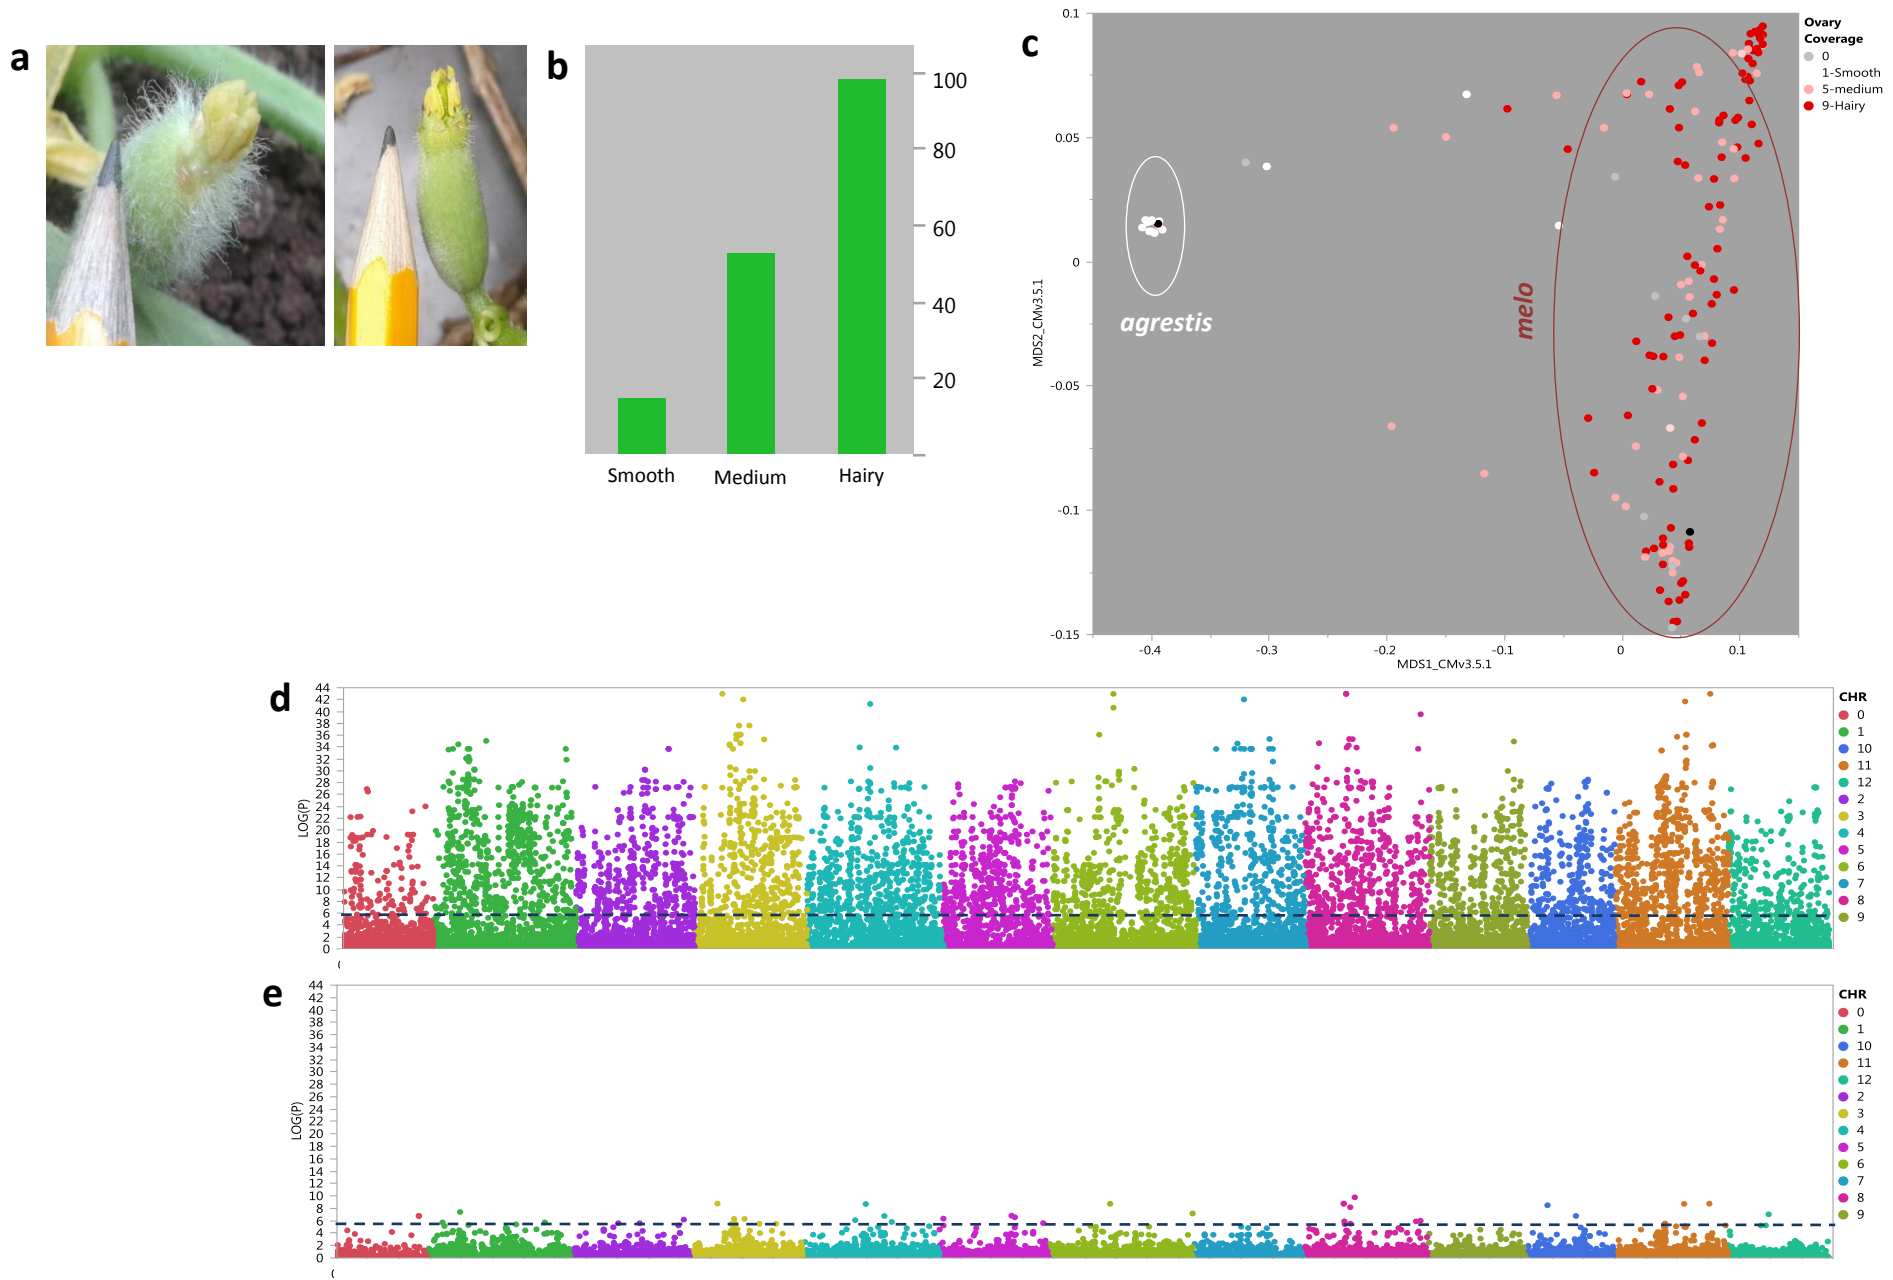

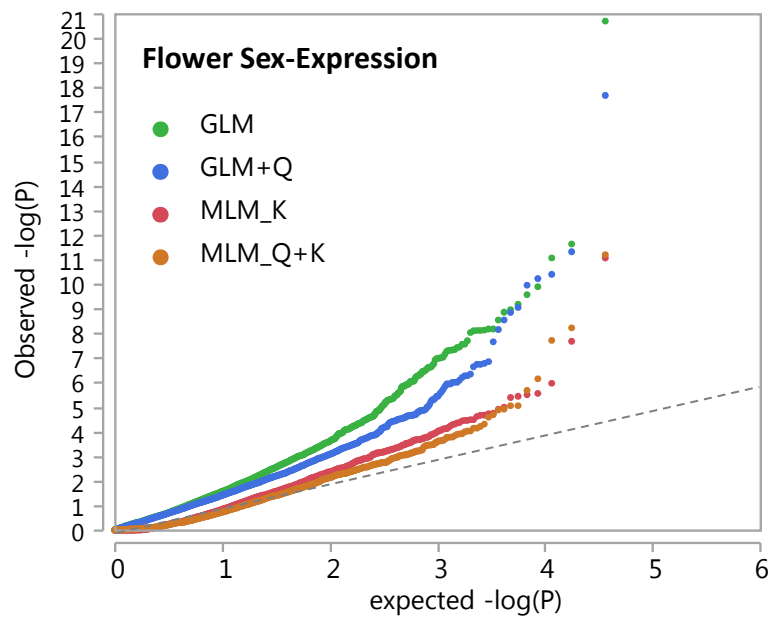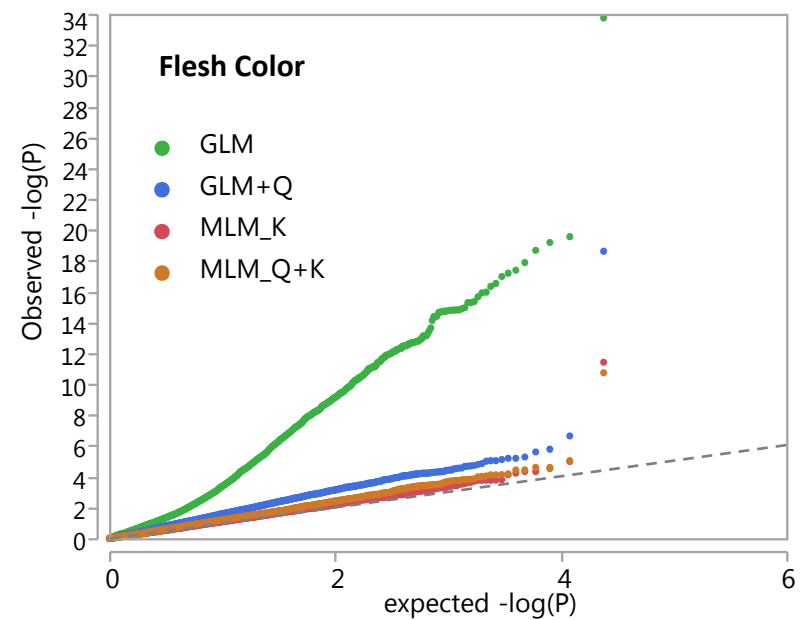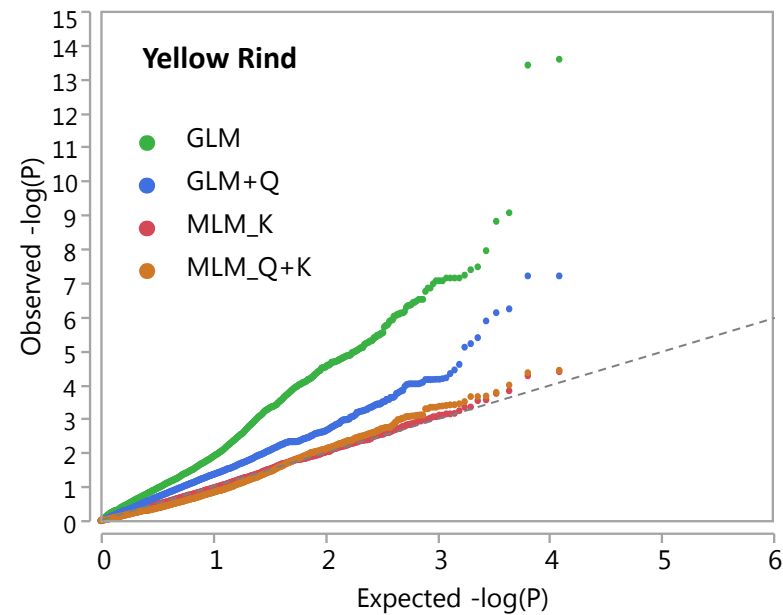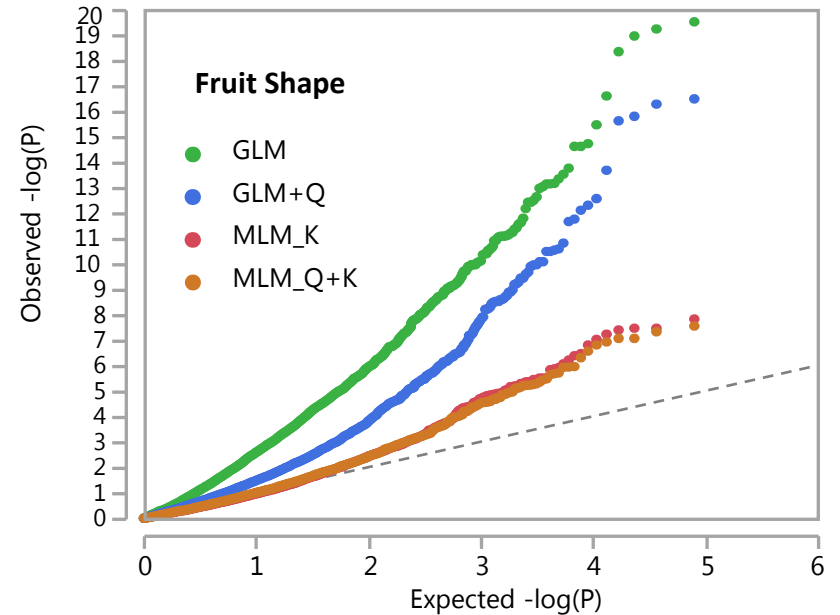

**Supplementary Figure S19: Quantile-quantile (Q-Q) plots comparing distribution of P values at the 4 statistical models used for GWA analyses.** The negative logarithm of the observed (y axis) and the expected (x axis) P value is plotted for each SNP (dot), and the gray dashed line indicates the null hypothesis of no true association.
